# Supplementary material
Source: PubMed Central journal article supplement (PMC6667191)
Supplement: NIHMS1030275-supplement-4.pdf [file NIHMS1030275-supplement-4.pdf]

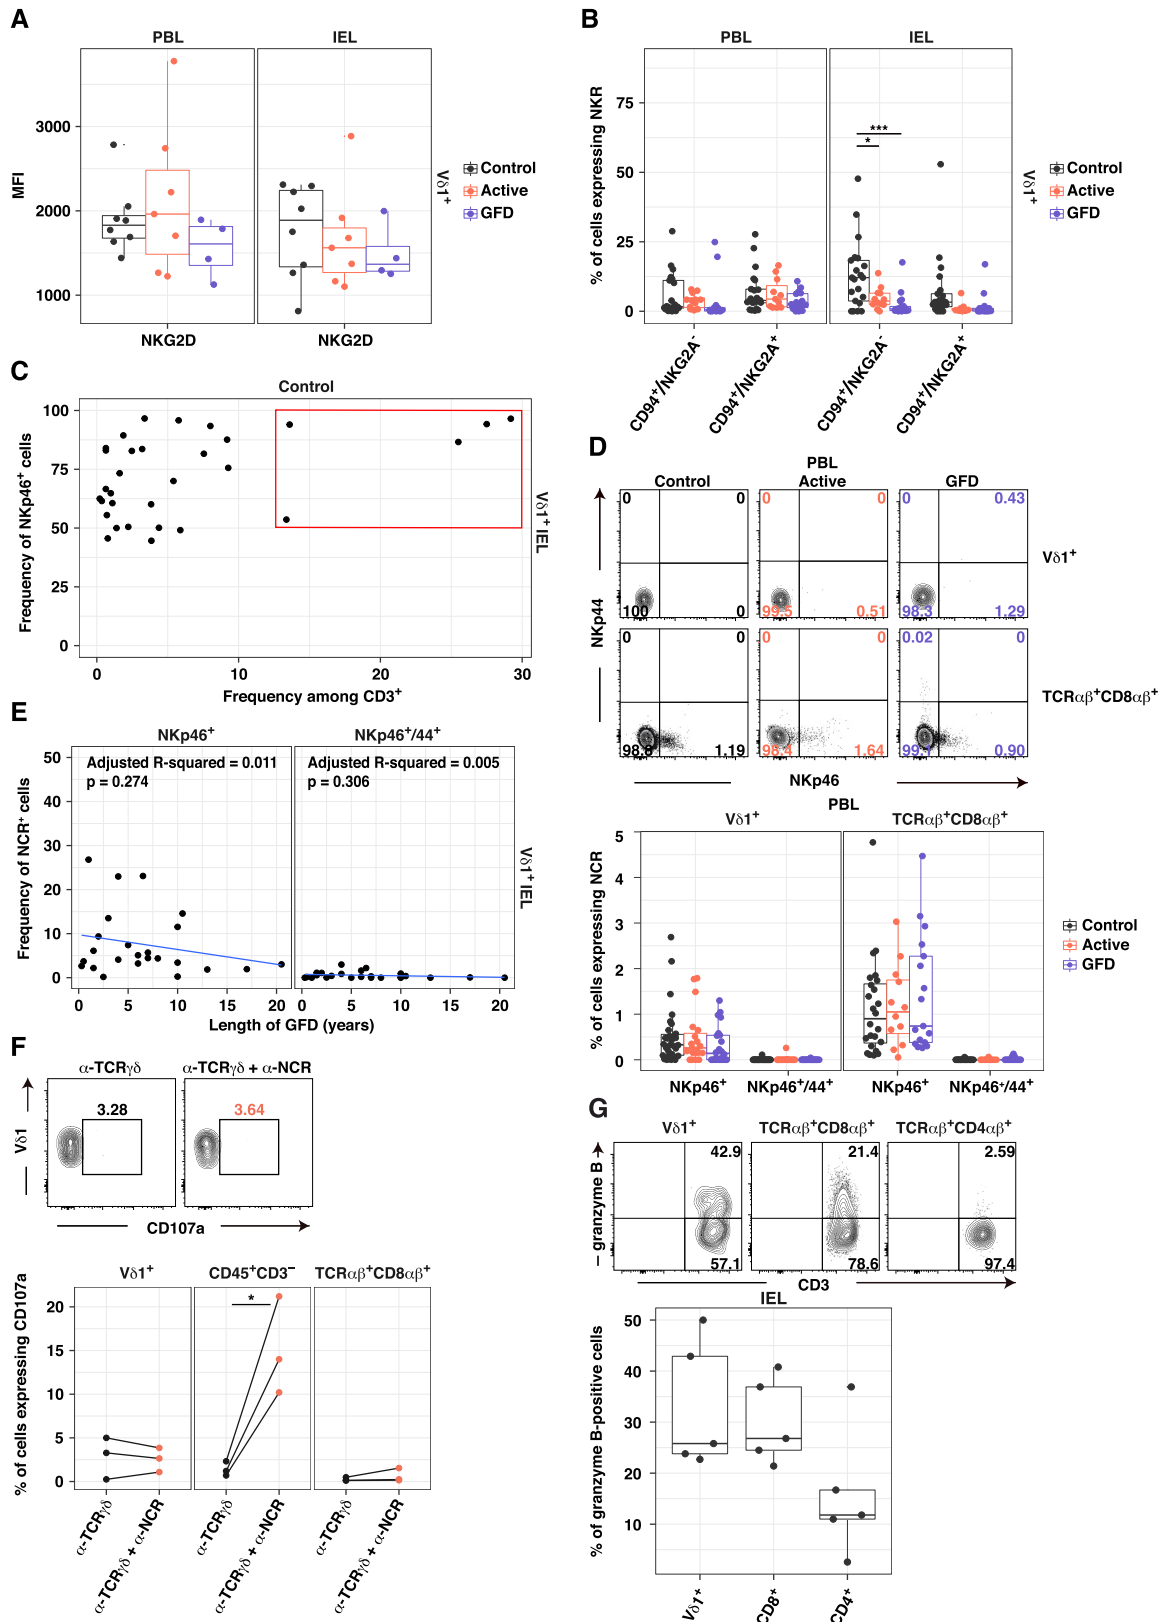

---

**Figure S1. Innate-like  $V\delta 1^+$  IELs Are Lost in CeD, Related to Figure 2**

(A) Expression of NKG2D on  $V\delta 1^+$  PBLs and IELs. Boxplots display first and third quartiles. (B) Expression of CD94 and NKG2A on  $V\delta 1^+$  PBLs and IELs. Boxplots display first and third quartiles. CD94<sup>+</sup>/NKG2A<sup>-</sup>, activating; CD94<sup>+</sup>/NKG2A<sup>+</sup>, inhibitory. \* $p < 0.05$ , \*\*\* $p < 0.001$ . One-way ANOVA with Tukey's test for multiple comparisons. (C) Frequency of  $V\delta 1^+$  IELs expressing NKp46 among total CD3<sup>+</sup> lymphocytes. The red box depicts individuals with  $V\delta 1^+$  IEL expansions of similar magnitude to those found in patients with CeD. (D) Expression of NKp46 and NKp44 on PBLs. Bottom: boxplots display first and third quartiles. (E) Frequency of  $V\delta 1^+$  IELs expressing NKp46 or NKp46/NKp44 versus the duration of treatment with a GFD. (F) Expression of CD107a on  $V\delta 1^+$  IELs after stimulation with plate-bound  $\alpha$ TCR $\gamma\delta \pm \alpha$ NKp46 and  $\alpha$ NKp44. \* $p < 0.05$ . Paired t test. (G) Expression of granzyme B among subsets of IELs. Bottom: boxplot displays first and third quartiles.

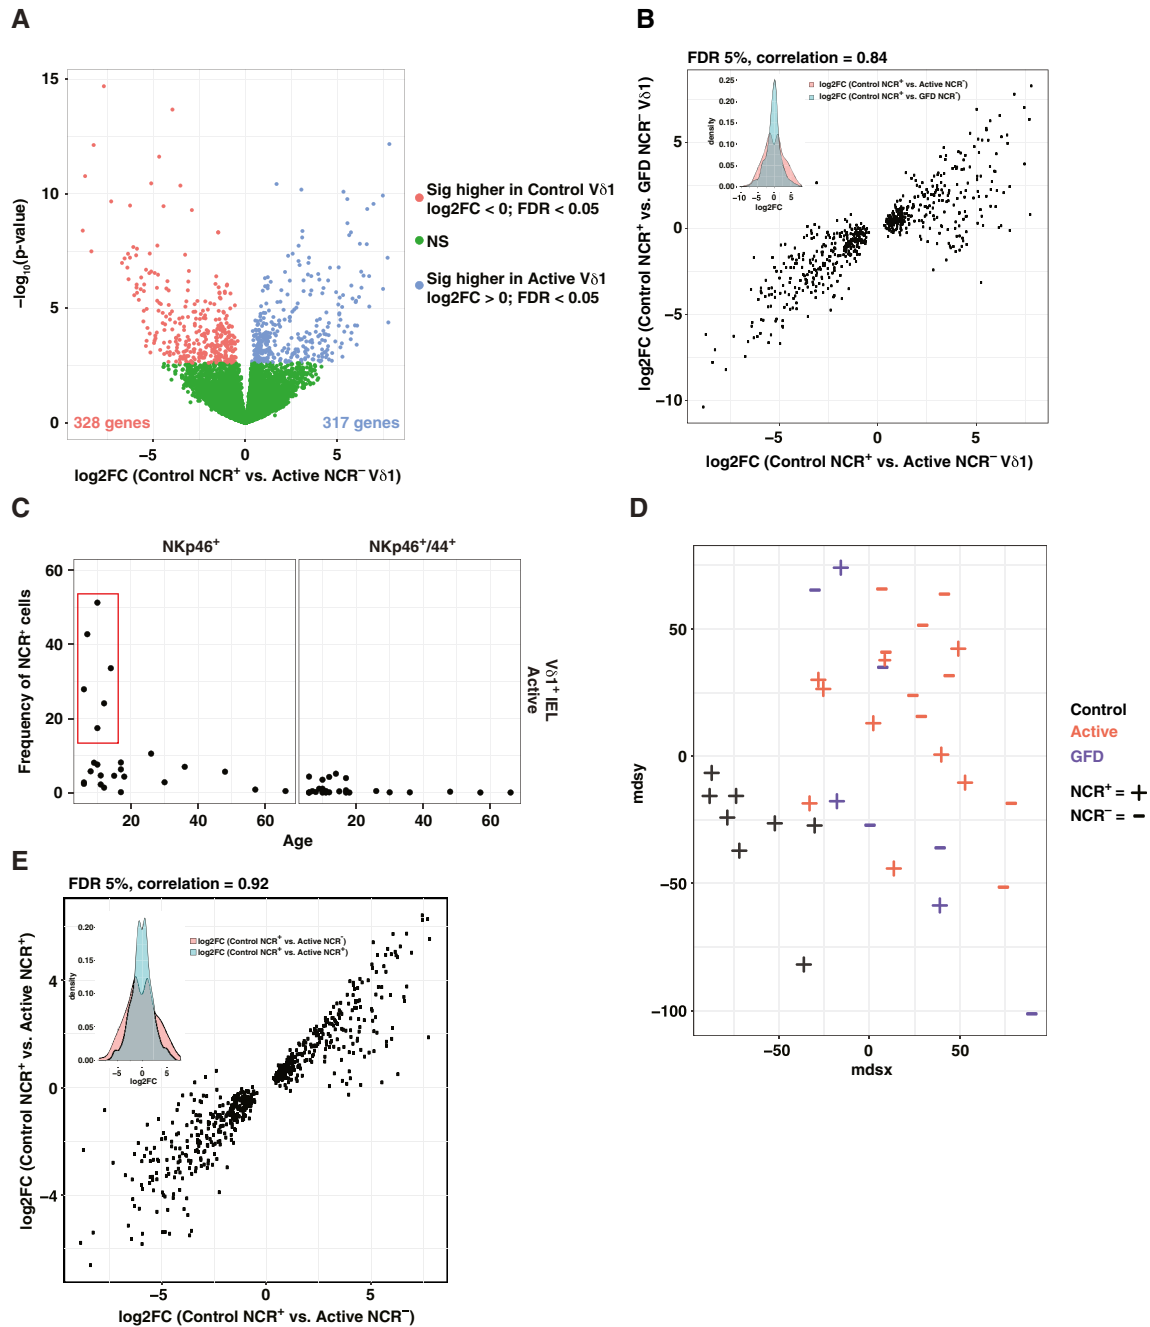

**Figure S2. The Transcriptional Program of  $V\delta 1^+$  IELs Is Permanently Altered in CeD, Related to Figure 4**

(A) Differentially expressed genes (DEGs) between  $NCR^+ V\delta 1^+$  IELs from healthy controls and  $NCR^- V\delta 1^+$  IELs from patients with active CeD. DEGs highlighted in blue were more highly expressed in  $NCR^- V\delta 1^+$  IELs from patients with active CeD (FDR < 5%), and DEGs highlighted in red were more highly expressed in  $NCR^+ V\delta 1^+$  IELs from healthy controls (FDR < 5%). (B) DEGs shown in (A) were used to correlate the magnitude of gene expression differences between  $NCR^+ V\delta 1^+$  IELs from healthy controls and  $NCR^- V\delta 1^+$  IELs from patients with active CeD (x axis) versus the magnitude of gene expression differences between  $NCR^+ V\delta 1^+$  IELs from healthy controls and  $NCR^- V\delta 1^+$  IELs from patients with GFD-treated CeD (y axis). Genes with  $\log_2FC$  values > 0 were more highly expressed in  $NCR^+ V\delta 1^+$  IELs from patients with active or GFD-treated CeD relative to  $NCR^+ V\delta 1^+$  IELs from healthy controls, and genes with  $\log_2FC$  values < 0 were more highly expressed in  $NCR^+ V\delta 1^+$  IELs from healthy controls relative to  $NCR^- V\delta 1^+$  IELs from patients with active or GFD-treated CeD. Top left:  $\log_2FC$  distribution for all genes in the dot plot summarized as a histogram for each comparison. Pearson correlation. (C) Frequency of  $V\delta 1^+$  IELs expressing NKp46 or NKp46/NKp44 versus age for patients with active CeD. The red box depicts individuals < 16 years old with high frequencies of NKp46 $^+$   $V\delta 1^+$  IELs. (D) Multidimensional scaling plot showing gene expression profile similarity among  $NCR^+ V\delta 1^+$  IELs from healthy controls,  $NCR^+ V\delta 1^+$  IELs from patients with active CeD,  $NCR^- V\delta 1^+$  IELs from patients with active CeD,  $NCR^+ V\delta 1^+$  IELs from patients with GFD-treated CeD, and  $NCR^- V\delta 1^+$  IELs from patients with GFD-treated CeD. (E) DEGs shown in (A) were used to correlate the magnitude of gene expression differences between  $NCR^+ V\delta 1^+$  IELs from healthy controls and  $NCR^- V\delta 1^+$  IELs from patients with active CeD (x axis)

(legend continued on next page)

---

versus the magnitude of gene expression differences between NCR<sup>+</sup> Vδ1<sup>+</sup> IELs from healthy controls and NCR<sup>+</sup> Vδ1<sup>+</sup> IELs from patients with active CeD (y axis). Genes with log<sub>2</sub>FC values > 0 were more highly expressed in NCR<sup>+</sup> and NCR<sup>-</sup> Vδ1<sup>+</sup> IELs from patients with active CeD relative to NCR<sup>+</sup> Vδ1<sup>+</sup> IELs from healthy controls, and genes with log<sub>2</sub>FC values < 0 were more highly expressed in NCR<sup>+</sup> Vδ1<sup>+</sup> IELs from healthy controls relative to NCR<sup>+</sup> and NCR<sup>-</sup> Vδ1<sup>+</sup> IELs from patients with active CeD. Top left: log<sub>2</sub>FC distribution for all genes in the dot plot summarized as a histogram for each comparison. Pearson correlation.

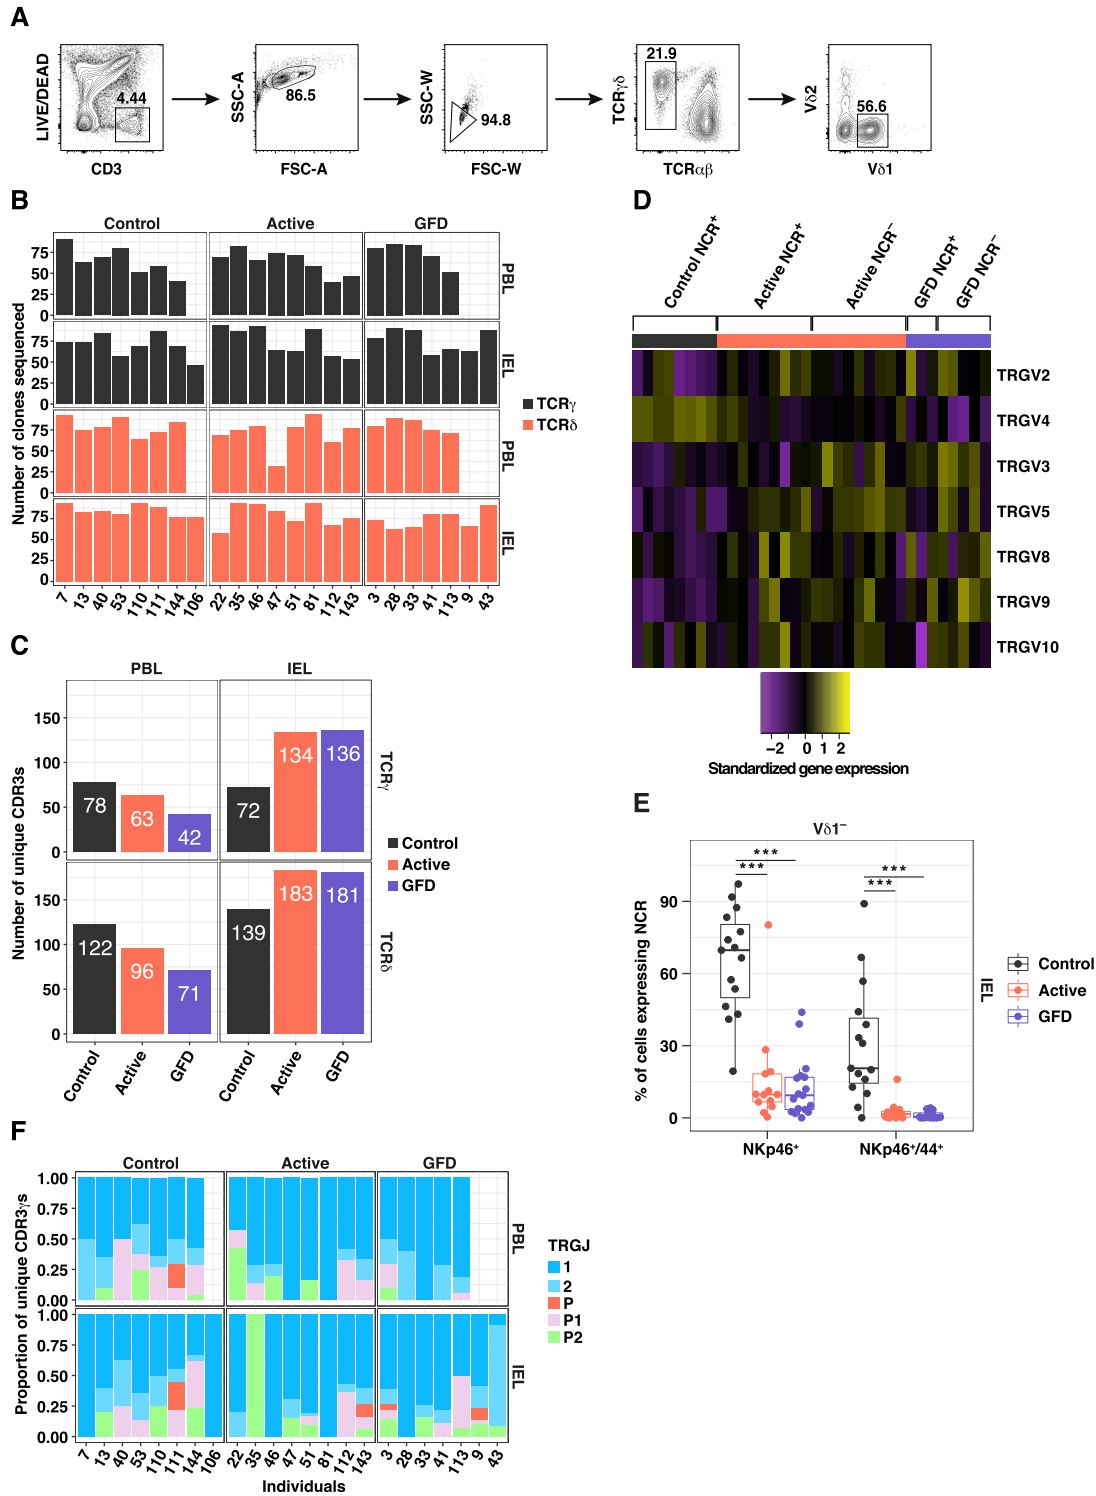

**Figure S3. The TRGV4 Gene-Associated "Gut Signature" Is Lost in CeD, Related to Figure 5**

(A) Gating strategy: live CD3 $^+$  TCR $\gamma\delta^+$  V $\delta$ 1 $^+$  lymphocytes were flow-sorted for molecular analysis of expressed TCRs. (B) Number of clones per individual/tissue yielding productive sequences for TCR $\gamma$  and TCR $\delta$ . (C) Number of unique CDR3 sequences per group/tissue for TCR $\gamma$  and TCR $\delta$ . (D) Expression of TRGV genes in NCR $^+$  V $\delta$ 1 $^+$  IELs from healthy controls (n = 8), NCR $^+$  V $\delta$ 1 $^+$  IELs from patients with active CeD (n = 9), NCR $^-$  V $\delta$ 1 $^+$  IELs from patients with active CeD (n = 9), NCR $^+$

(legend continued on next page)

---

V $\delta$ 1<sup>+</sup> IELs from patients with GFD-treated CeD (n = 3), and NCR<sup>-</sup> V $\delta$ 1<sup>+</sup> IELs from patients with GFD-treated CeD (n = 5). Germline transcripts were extracted from the RNA-seq dataset. Expression values were standardized (mean centered) on a per gene basis. (E) Frequency of V $\delta$ 1<sup>-</sup> IELs expressing NKp46 or NKp46/NKp44. Boxplot displays first and third quartiles. \*\*\*p < 0.001. One-way ANOVA with Tukey's test for multiple comparisons. (F) Proportion of unique CDR3 $\gamma$  sequences using a particular *TRGJ* gene summarized by individual.



---

**Figure S4.  $V\delta 1^+$  IELs Express TCRs with Longer CDR3 $\delta$  Loops in CeD, Related to Figure 6**

(A) Shannon diversity indices summarized in violin plots for CDR3 $\gamma$  and CDR3 $\delta$  sequences. (B) Proportion of unique CDR3 $\delta$  sequences using a particular amino acid (AA). White lines demarcate individual contributions. Healthy controls: PBLs, n = 7; IELs, n = 8. Patients with active CeD: PBLs, n = 8; IELs, n = 8. Patients with GFD-treated CeD: PBLs, n = 5; IELs, n = 7. ‡ denotes amino acids with significant differences between two groups. Firth's penalized logistic regression and beta regression. See Table S5C. (C) Proportion of unique CDR3 $\delta$  sequences using a particular *TRDJ* gene summarized by individual. (D) Statistical assignment of *TRDD* gene use for each unique CDR3 $\delta$  sequence. Each candidate forward and reverse *TRDD* gene sequence (rows) was tested for a significant substring match to each unique CDR3 $\delta$  sequence (columns). Significant *TRDD* gene assignments (FDR < 0.05) are shown in red; non-significant *TRDD* gene assignments (FDR > 0.05) are shown in blue. (E) Frequency of unique CDR3 $\delta$  sequences incorporating a particular motif summarized by individual. (F) Proportion of unique CDR3 $\delta$  sequences using a particular feature. Healthy controls: PBLs, n = 7; IELs, n = 8. Patients with active CeD: PBLs, n = 8; IELs, n = 8. Patients with GFD-treated CeD: PBLs, n = 5; IELs, n = 7. \*p < 0.05, \*\*\*p < 0.001. Firth's penalized logistic regression and beta regression. See Table S5D. (G) Cumulative distribution for CDR3 $\delta$  length across groups. \*\*p < 0.01. Kolmogorov-Smirnov test. (H) Unique CDR3 $\gamma$  sequences among  $V\delta 1^+$  IELs from patients with active CeD visualized using iceLogo for enrichment of non-germline-encoded amino acids relative to unique CDR3 $\gamma$  sequences among  $V\delta 1^+$  IELs from healthy controls and patients with GFD-treated CeD. Position 14 is closest to the *TRGJ* gene-encoded segment. (I) Frequency of unique CDR3 $\gamma$  sequences with an H-J1 motif summarized by individual.



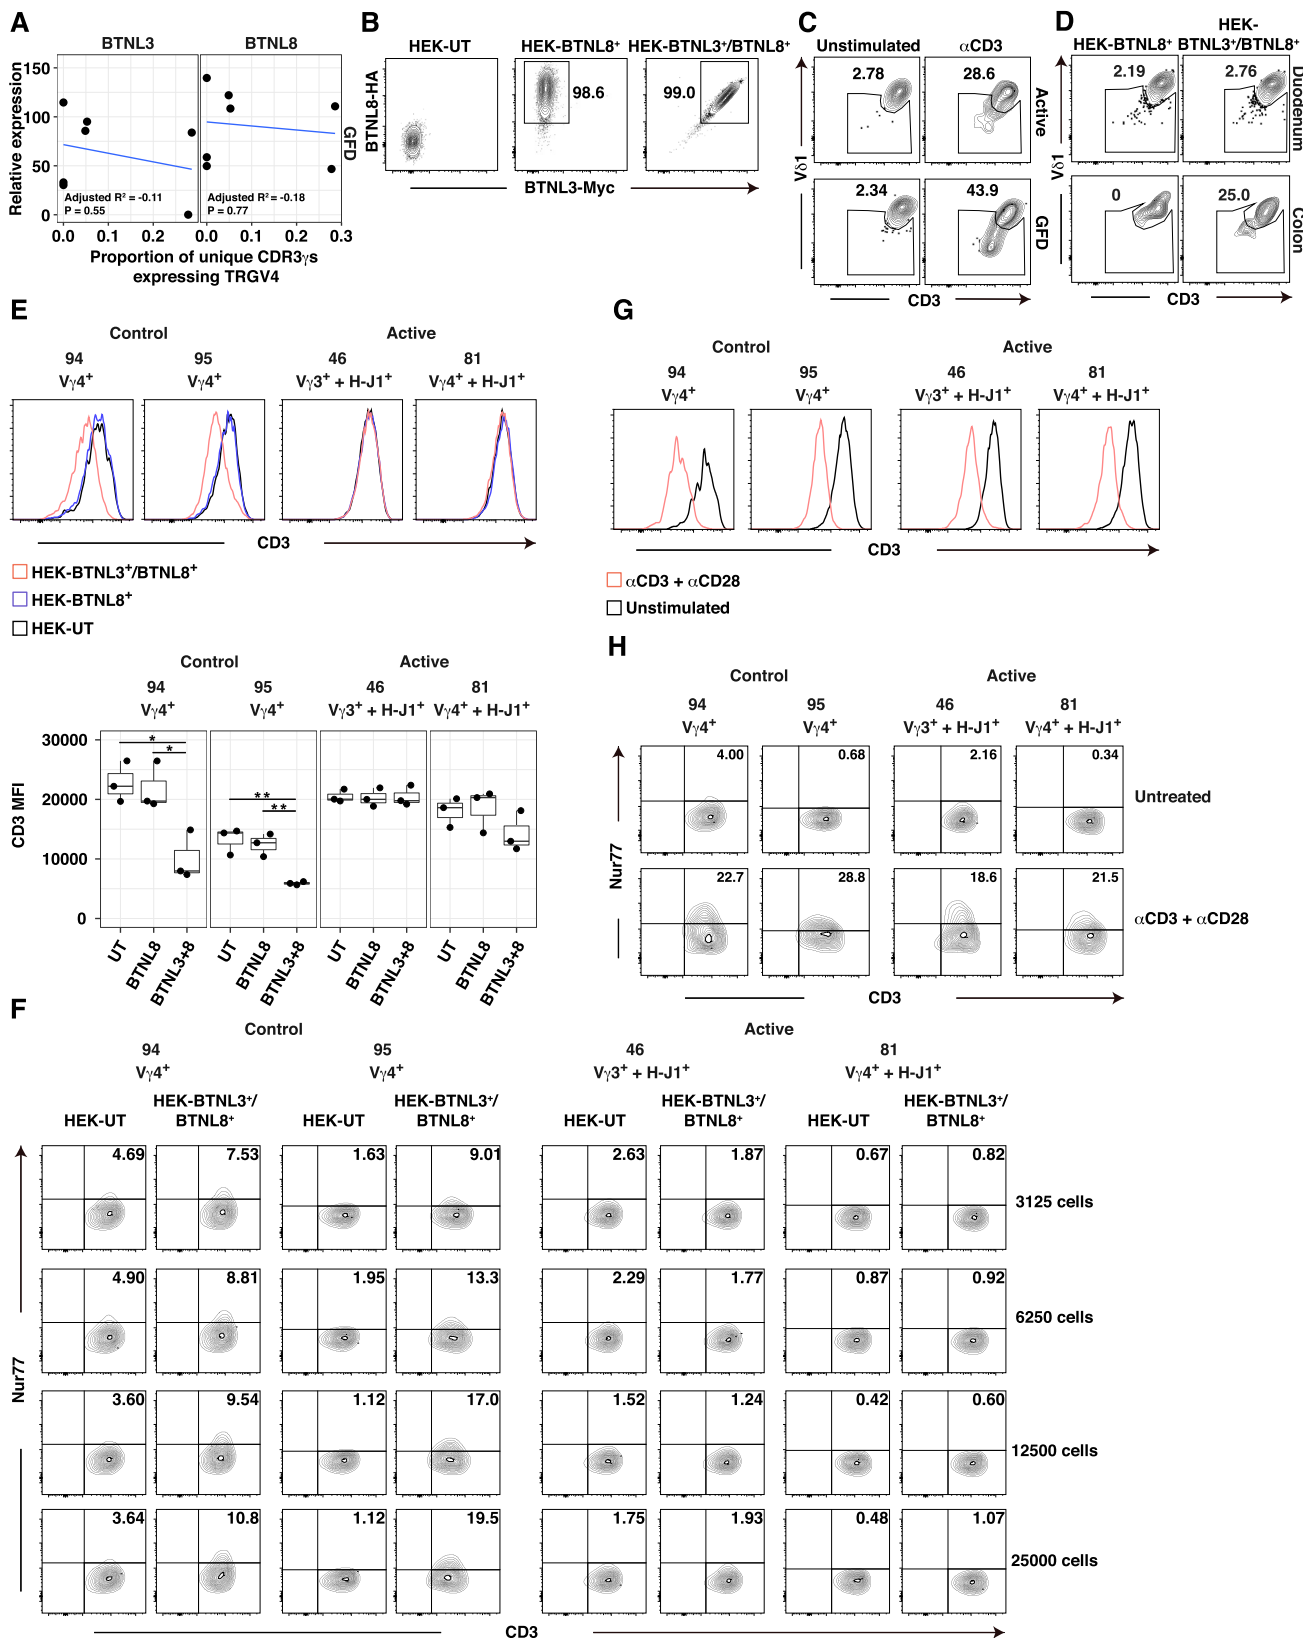

(legend on next page)

---

**Figure S5. BTNL3/8-Reactive V $\delta$ 1<sup>+</sup> IELs Are Lost in CeD, Related to Figure 7**

(A) Proportion of unique CDR3 $\gamma$  sequences using the *TRGV4* gene versus relative expression of *BTNL3* and *BTNL8* for patients with GFD-treated CeD. Linear regression. (B) Expression of *BTNL3* (myc<sup>+</sup>) and *BTNL8* (HA<sup>+</sup>) on untransduced (UT) HEK293T cells (left), HEK293T cells transduced with *BTNL8*-HA (middle), and HEK293T cells transduced with *BTNL3*-myc and *BTNL8*-HA (right). (C) Downregulation of CD3 and V $\delta$ 1 on the surface of IELs pre-gated for V $\delta$ 1 expression after stimulation for 2 hr with 1.5  $\mu$ g/mL of plate-bound purified  $\alpha$ CD3. (D) Downregulation of CD3 and V $\delta$ 1 on the surface of IELs pre-gated for V $\delta$ 1 expression after overnight incubation with HEK293T-*BTNL8*<sup>+</sup> or HEK293T-*BTNL3/8*<sup>+</sup> cells. (E) SKW3 cell lines stably expressing clonal TCRs were cultured overnight with HEK293T-UT (black), HEK293T-*BTNL8*<sup>+</sup> (blue), or HEK293T-*BTNL3/8*<sup>+</sup> cells (red). Top: representative histogram overlays displaying surface expression of CD3 on SKW3 cells. Bottom: boxplots show first and third quartiles (n = 3 independent experiments). \*p < 0.05, \*\*p < 0.01. One-way ANOVA followed by Tukey's test for multiple comparisons. (F) SKW3 cells stably expressing clonal TCRs were cultured for 2 hr with varying numbers of untransduced HEK293T cells (HEK293T-UT) or HEK293T-*BTNL3/8*<sup>+</sup> cells. Representative contour plots from a single experiment display expression of CD3 and Nur77. (G) Expression of CD3 on unstimulated (black) or  $\alpha$ CD3/ $\alpha$ CD28-stimulated SKW3 cells (red) stably expressing the indicated TCRs. (H) Surface expression of CD3 and intracellular expression of Nur77 for the indicated SKW transductants cultured with HEK293T-UT cells (untreated) or stimulated with  $\alpha$ CD3/ $\alpha$ CD28 beads.

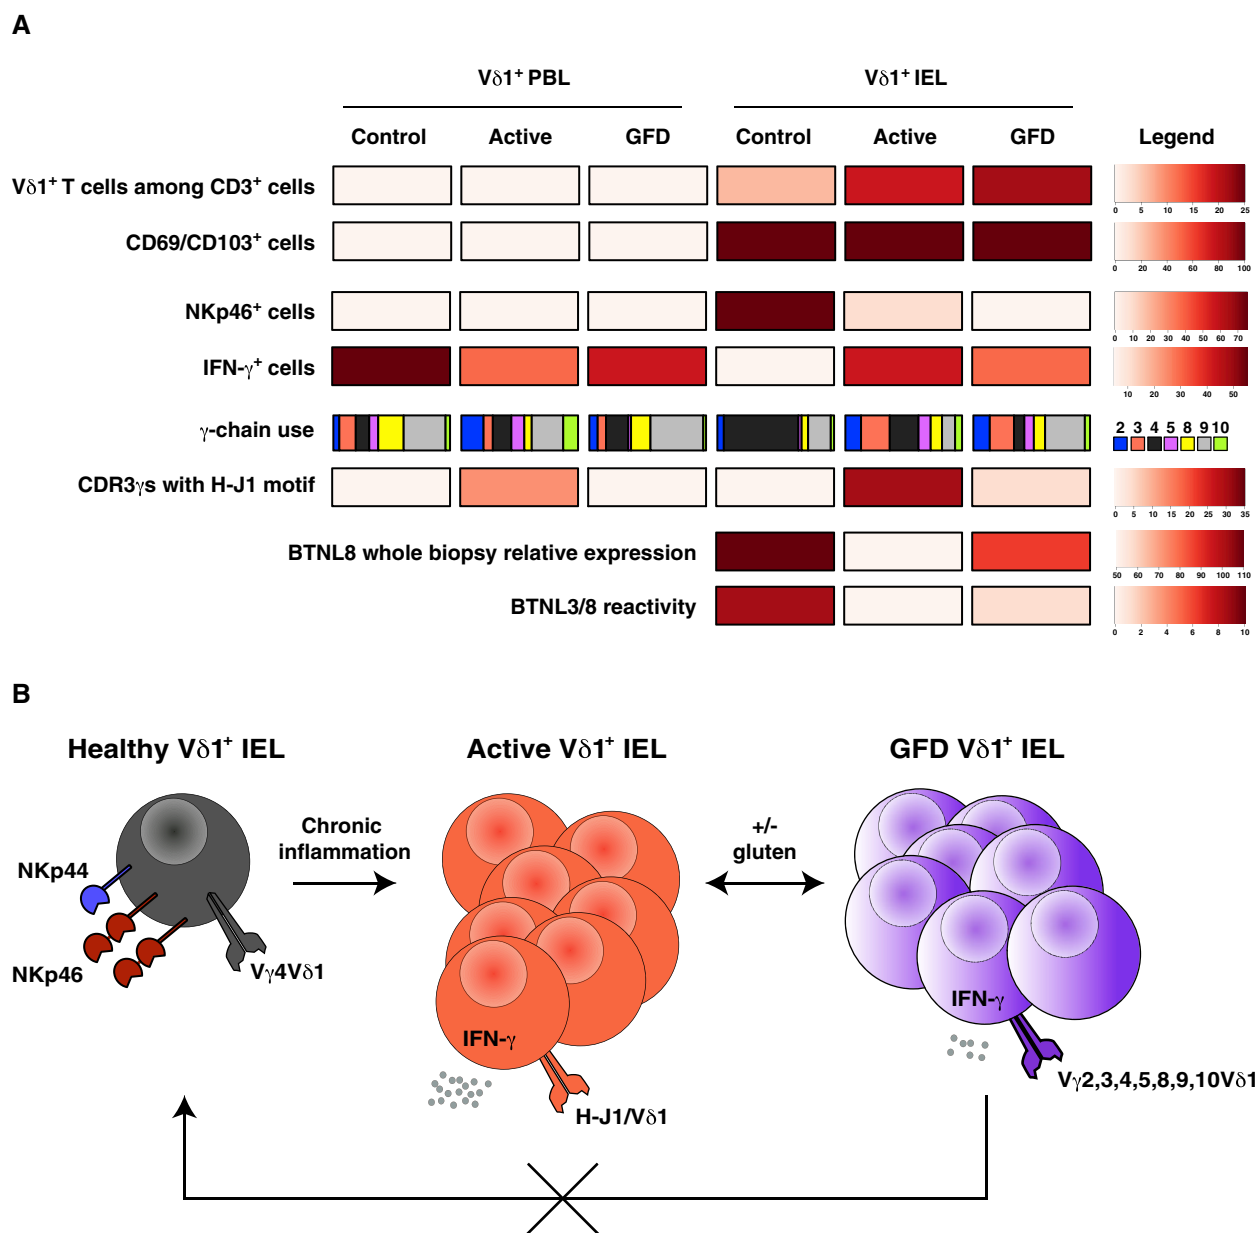

**Figure S6. The Tissue-Resident V $\delta$ 1<sup>+</sup> IEL Compartment Is Permanently Reshaped in CeD, Related to Figures 1–7**  
 (A) Top: V $\delta$ 1<sup>+</sup> IELs are expanded in patients with CeD and adopt a tissue-resident phenotype characterized by expression of CD69 and CD103. Mean frequency values are summarized by group/tissue. Middle/top: V $\delta$ 1<sup>+</sup> IELs expressing NKp46 are lost in CeD and replaced by IFN- $\gamma$ -producing V $\delta$ 1<sup>+</sup> IELs. Mean frequency values are summarized by group/tissue. Middle/bottom: V $\delta$ 1<sup>+</sup> IELs lose the *TRGV4* gene-associated ‘gut signature’ in patients with CeD (data summarized by group/tissue). This loss is associated with the emergence of CDR3 $\gamma$  sequences incorporating the H-J1 motif among V $\delta$ 1<sup>+</sup> IELs in patients with active CeD. These H-J1<sup>+</sup> CDR3 $\gamma$  sequences become less common after exclusion of dietary gluten. Bottom: *BTNL8* expression is lost in patients with active CeD, and V $\delta$ 1<sup>+</sup> IELs no longer recognize BTNL3/8. Although *BTNL8* expression levels recover on a strict GFD, BTNL3/8 reactivity is permanently lost among V $\delta$ 1<sup>+</sup> IELs. (B) V $\delta$ 1<sup>+</sup> IELs in the healthy state (black) express NKp46 and NKp44, as well as V $\gamma$ 4<sup>+</sup>/V $\delta$ 1<sup>+</sup> TCRs that recognize BTNL3/8. These activating NCRs allow healthy V $\delta$ 1<sup>+</sup> IELs to recognize and eliminate stressed, infected, or malignant IECs. In patients with CeD, decreased expression of *BTNL3* and *BTNL8* is accompanied by a loss of V $\gamma$ 4<sup>+</sup>/V $\delta$ 1<sup>+</sup> IELs, which are replaced by V $\delta$ 1<sup>+</sup> IELs (red) that produce IFN- $\gamma$  in a gluten-dependent manner and express TCR $\gamma$  chains enriched for the H-J1<sup>+</sup> CDR3 $\gamma$  motif that fail to recognize BTNL3/8. These H-J1<sup>+</sup> V $\delta$ 1<sup>+</sup> IELs contract after withdrawal of dietary gluten, but are not replaced by NCR<sup>+</sup> V $\gamma$ 4<sup>+</sup>/V $\delta$ 1<sup>+</sup> IELs. Instead, V $\delta$ 1<sup>+</sup> IELs in patients with GFD-treated CeD are enriched for TCRs that fail to recognize BTNL3/8. Repertoire diversity also increases (purple color gradient), suggesting of a lack of selection pressure in the absence of gluten-induced inflammation. This model is consistent with a fundamental reshaping of the tissue-resident V $\delta$ 1<sup>+</sup> IEL compartment after the onset of CeD.

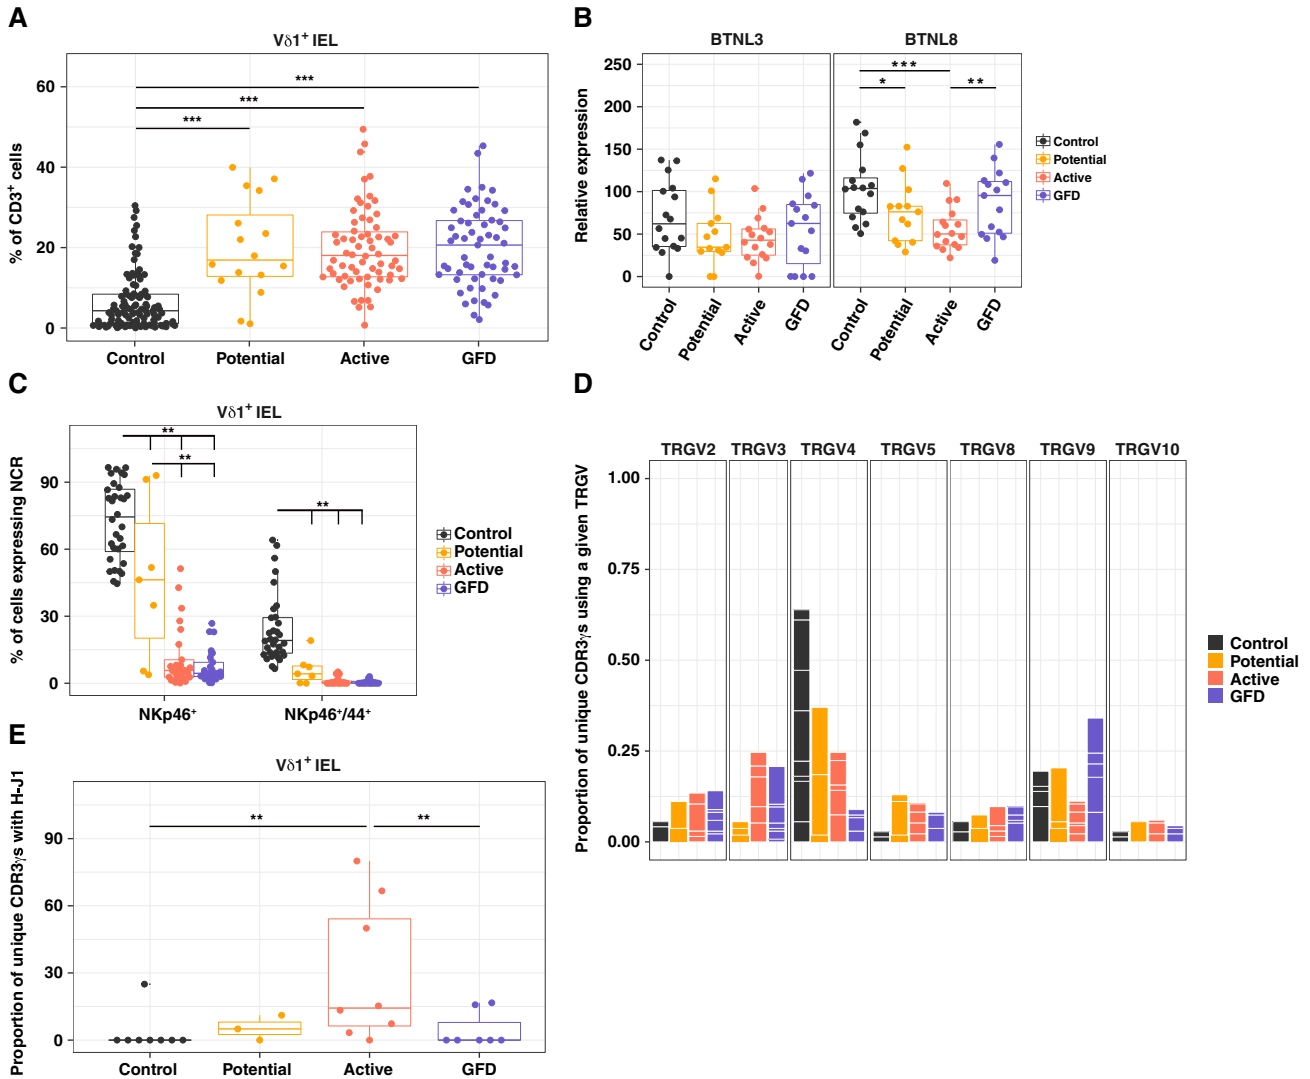

**Figure S7. Alterations to the  $V\delta 1^+$  IEL Compartment Precede Tissue Damage in CeD, Related to Figure 7**

(A) Frequency of  $V\delta 1^+$  cells among  $CD3^+$  lymphocytes. Boxplot displays first and third quartiles. \*\*\* $p < 0.001$ . One-way ANOVA with Tukey's test for multiple comparisons. (B) Expression of *BTNL3* and *BTNL8* relative to *GAPDH* in small intestinal biopsies determined via qPCR. Boxplots display first and third quartiles. \* $p < 0.05$ , \*\* $p < 0.01$ , \*\*\* $p < 0.001$ . Kruskal-Wallis rank sum test with Dunn's test for multiple comparisons. (C) Frequency of  $V\delta 1^+$  IELs expressing NKp46 with or without NKp44. Boxplot displays first and third quartiles. \*\* $p < 0.01$ . One-way ANOVA with Tukey's test for multiple comparisons. (D) Proportion of unique  $CDR3\gamma$  sequences using a particular TRGV gene among  $V\delta 1^+$  IELs. White lines demarcate individual contributions. (E) Frequency of unique  $CDR3\gamma$  sequences incorporating the H-J1 motif among  $V\delta 1^+$  IELs. Boxplot displays first and third quartiles. \*\* $p < 0.01$ . Kruskal-Wallis rank sum test with Dunn's test for multiple comparisons.
