# Supplementary material
Source: PubMed Central journal article supplement (PMC6667191)
Supplement: NIHMS1030275-supplement-Supplemental.pdf [file NIHMS1030275-supplement-Supplemental.pdf]

Cell, Volume 176

## Supplemental Information

### Chronic Inflammation Permanently Reshapes

### Tissue-Resident Immunity in Celiac Disease

Toufic Mayassi, Kristin Ladell, Herman Gudjonson, James E. McLaren, Dustin G. Shaw, Mai T. Tran, Jagoda J. Rokicka, Ian Lawrence, Jean-Christophe Grenier, Vincent van Unen, Cezary Ciszewski, Matthew Dimaano, Hoda E. Sayegh, Vinod Kumar, Cisca Wijmenga, Peter H.R. Green, Ranjana Gokhale, Hilary Jericho, Carol E. Semrad, Stefano Guandalini, Aaron R. Dinner, Sonia S. Kupfer, Hugh H. Reid, Luis B. Barreiro, Jamie Rossjohn, David A. Price, and Bana Jabri

**Table S1. Summary of key cohorts, Related to Figures 1-7**

|                                              | Control                                                                        | Active                                                                         | GFD                                                                            |
|----------------------------------------------|--------------------------------------------------------------------------------|--------------------------------------------------------------------------------|--------------------------------------------------------------------------------|
| Figure 1A                                    | n = 102<br>Average age = 28<br>Age range = 2 – 61<br>Male = 29<br>Female = 73  | n = 66<br>Average age = 24.2<br>Age range = 6 – 66<br>Male = 26<br>Female = 40 | n = 59<br>Average age = 34.8<br>Age range = 7 – 69<br>Male = 16<br>Female = 43 |
| NCR cohort<br>Figure 2, S1                   | n = 31<br>Average age = 25.3<br>Age range = 9 – 61<br>Male = 8<br>Female = 23  | n = 25<br>Average age = 19.2<br>Age range = 6 – 66<br>Male = 9<br>Female = 16  | n = 24<br>Average age = 35.7<br>Age range = 8 – 69<br>Male = 7<br>Female = 17  |
| Cytokine cohort<br>Figure 3                  | n = 8<br>Average age = 39.6<br>Age range = 16 – 54<br>Male = 5<br>Female = 3   | n = 8<br>Average age = 29.9<br>Age range = 10 – 56<br>Male = 3<br>Female = 5   | n = 16<br>Average age = 44.3<br>Age range = 19 – 69<br>Male = 5<br>Female = 11 |
| RNA-seq cohort<br>Figure 4, S2               | n = 8<br>Average age = 18.5<br>Age range = 11 – 35<br>Male = 2<br>Female = 6   | n = 9<br>Average age = 14<br>Age range = 6 – 36<br>Male = 3<br>Female = 6      | n = 5<br>Average age = 35<br>Age range = 20 – 61<br>Male = 0<br>Female = 5     |
| Gluten challenge cohort<br>Figure 3          |                                                                                |                                                                                | n = 4<br>Average age = 51.8<br>Age range = 26 – 66<br>Male = 1<br>Female = 3   |
| TCR sequencing cohort<br>Figure 5, 6, S3, S4 | n = 8<br>Average age = 24.1<br>Age range = 10 – 54<br>Male = 2<br>Female = 6   | n = 8<br>Average age = 27.9<br>Age range = 11 – 51<br>Male = 3<br>Female = 5   | n = 7<br>Average age = 37<br>Age range = 17 – 55<br>Male = 2<br>Female = 5     |
| BTNL expression<br>cohort<br>Figure 7, S5    | n = 16<br>Average age = 23.9<br>Age range = 10 – 54<br>Male = 5<br>Female = 11 | n = 16<br>Average age = 26<br>Age range = 10 – 66<br>Male = 6<br>Female = 10   | n = 15<br>Average age = 33.1<br>Age range = 10 – 55<br>Male = 6<br>Female = 9  |

**Table S2: Gene modules, Related to Figure 4 and Figure 6**

| <b>NK Module</b> | <b>Cytokine Module</b> | <b>Tissue-Repair Module</b> | <b>Transcription Factor Module</b> | <b>TCR Activation Module</b> |
|------------------|------------------------|-----------------------------|------------------------------------|------------------------------|
| <i>NCR1</i>      | <i>EGF</i>             | <i>HGF</i>                  | <i>TBX21</i>                       | <i>BCL10</i>                 |
| <i>NCR2</i>      | <i>FGF2</i>            | <i>EGF</i>                  | <i>GATA3</i>                       | <i>CARD11</i>                |
| <i>NCR3</i>      | <i>FLT3L</i>           | <i>HB-EGF</i>               | <i>FOXP3</i>                       | <i>CD247</i>                 |
| <i>KLRC1</i>     | <i>GCSF</i>            | <i>AREG</i>                 | <i>RORC</i>                        | <i>CD3D</i>                  |
| <i>KLRC2</i>     | <i>GMCSF</i>           | <i>FGF-2</i>                | <i>EOMES</i>                       | <i>CD3E</i>                  |
| <i>KLRC3</i>     | <i>IFNG</i>            | <i>KGF</i>                  | <i>STAT1</i>                       | <i>CD3G</i>                  |
| <i>TYROBP</i>    | <i>IL17A</i>           | <i>FGF-10</i>               | <i>STAT2</i>                       | <i>CHUK</i>                  |
| <i>KIR2DL4</i>   | <i>IL4</i>             | <i>IGF-1</i>                | <i>STAT3</i>                       | <i>CSK</i>                   |
| <i>KIR2DL1</i>   | <i>IL5</i>             | <i>VEGF</i>                 | <i>STAT4</i>                       | <i>ENAH</i>                  |
| <i>KIR2DL3</i>   | <i>IL3</i>             | <i>TGFA</i>                 | <i>STAT5</i>                       | <i>EVL</i>                   |
| <i>KIR3DL3</i>   | <i>IL6</i>             | <i>TGFB</i>                 | <i>RUNX1</i>                       | <i>FYB</i>                   |
| <i>KIR3DL2</i>   | <i>IL7</i>             | <i>IGF1</i>                 | <i>RUNX2</i>                       | <i>GRAP2</i>                 |
| <i>KIR3DL1</i>   | <i>CXCL8</i>           | <i>CSF2</i>                 | <i>RUNX3</i>                       | <i>HLA-DPA1</i>              |
| <i>KIR3DL3</i>   | <i>IL9</i>             | <i>MMP10</i>                | <i>PLZF</i>                        | <i>HLA-DPB1</i>              |
| <i>FCGR3A</i>    | <i>MCP3</i>            | <i>MMP25</i>                | <i>THPOK</i>                       | <i>HLA-DQA1</i>              |
| <i>GNLY</i>      | <i>CCL4</i>            | <i>FGF16</i>                | <i>TCF7</i>                        | <i>HLA-DQA2</i>              |
| <i>CTSW</i>      | <i>CCL3</i>            | <i>FGF18</i>                | <i>FOXP1</i>                       | <i>HLA-DRB1</i>              |
| <i>PRF1</i>      | <i>TGFA</i>            | <i>PDGFB</i>                | <i>FOXO1</i>                       | <i>HLA-DRB5</i>              |
| <i>CD70</i>      | <i>TNFA</i>            | <i>HMGB1</i>                | <i>ELF1</i>                        | <i>IKBKB</i>                 |
| <i>SIT1</i>      | <i>LTA</i>             | <i>FURIN</i>                | <i>IKAROS</i>                      | <i>IKBKG</i>                 |
| <i>ICAM2</i>     | <i>VEGF</i>            | <i>WNT11</i>                | <i>ETS1</i>                        | <i>ITK</i>                   |
| <i>SLAMF1</i>    | <i>SPP1</i>            | <i>JAG1</i>                 | <i>SATB1</i>                       | <i>LAT</i>                   |
| <i>GZMA</i>      | <i>IL10</i>            | <i>WNT10A</i>               | <i>IRF4</i>                        | <i>LCK</i>                   |
| <i>GZMB</i>      | <i>AREG</i>            | <i>HIF1A</i>                | <i>IRF8</i>                        | <i>LCP2</i>                  |
| <i>GZMK</i>      | <i>IL33</i>            |                             | <i>IRF2</i>                        | <i>LOC646626</i>             |
| <i>CD56</i>      | <i>IL22</i>            |                             | <i>IRF1</i>                        | <i>MALT1</i>                 |
| <i>PRF1</i>      | <i>IL21</i>            |                             | <i>IRF3</i>                        | <i>MAP3K7</i>                |
| <i>FASL</i>      | <i>IL27</i>            |                             | <i>IRF5</i>                        | <i>NCK1</i>                  |
|                  | <i>TGFB</i>            |                             | <i>IRF7</i>                        | <i>NFKBIA</i>                |
|                  | <i>IL2</i>             |                             | <i>BLIMP1</i>                      | <i>PAG1</i>                  |
|                  | <i>RANTES</i>          |                             | <i>HOBIT</i>                       | <i>PAK1</i>                  |
|                  | <i>KGF</i>             |                             | <i>LEF1</i>                        | <i>PAK2</i>                  |
|                  |                        |                             | <i>KLF3</i>                        | <i>PDPK1</i>                 |
|                  |                        |                             | <i>ZEB2</i>                        | <i>PIK3CA</i>                |
|                  |                        |                             |                                    | <i>PIK3CB</i>                |
|                  |                        |                             |                                    | <i>PIK3R1</i>                |
|                  |                        |                             |                                    | <i>PIK3R2</i>                |
|                  |                        |                             |                                    | <i>PLCG1</i>                 |
|                  |                        |                             |                                    | <i>PRKCQ</i>                 |
|                  |                        |                             |                                    | <i>PTEN</i>                  |
|                  |                        |                             |                                    | <i>PTPRC</i>                 |
|                  |                        |                             |                                    | <i>RELA</i>                  |
|                  |                        |                             |                                    | <i>RIPK2</i>                 |
|                  |                        |                             |                                    | <i>TAB2</i>                  |
|                  |                        |                             |                                    | <i>TMEM189-UBE2V1</i>        |

|  |  |  |  |                  |
|--|--|--|--|------------------|
|  |  |  |  | <i>TRAF6</i>     |
|  |  |  |  | <i>TRAT1</i>     |
|  |  |  |  | <i>UBE2N</i>     |
|  |  |  |  | <i>VASP</i>      |
|  |  |  |  | <i>WAS</i>       |
|  |  |  |  | <i>ZAP70</i>     |
|  |  |  |  | <i>NR4A1</i>     |
|  |  |  |  | <i>CD25</i>      |
|  |  |  |  | <i>CD69</i>      |
|  |  |  |  | <i>IL7R</i>      |
|  |  |  |  | <i>CCR7</i>      |
|  |  |  |  | <i>ZAP70</i>     |
|  |  |  |  | <i>NFKB1</i>     |
|  |  |  |  | <i>CTLA4</i>     |
|  |  |  |  | <i>MKI67</i>     |
|  |  |  |  | <i>PD1/PDCD1</i> |
|  |  |  |  | <i>CD137</i>     |
|  |  |  |  | <i>CD38</i>      |
|  |  |  |  | <i>CD57</i>      |
|  |  |  |  | <i>CD5</i>       |
|  |  |  |  | <i>CD6</i>       |
|  |  |  |  | <i>CD28</i>      |

**Table S3: TCR sequencing cohort, Related to figure 5 and Figure 6**

| Group   | Patient ID | Tissue | Age | Sex | HLA                    | Time on a GFD (years) | Cell number sorted for sequencing |
|---------|------------|--------|-----|-----|------------------------|-----------------------|-----------------------------------|
| Control | 7          | IEL    | 14  | F   | DQ2.5/DQ2.2            |                       | 768                               |
| Control | 7          | PBL    | 14  | F   | DQ2.5/DQ2.2            |                       | 4368                              |
| Control | 13         | IEL    | 18  | F   | DQ2/DQ8 <sup>neg</sup> |                       | 446                               |
| Control | 13         | PBL    | 18  | F   | DQ2/DQ8 <sup>neg</sup> |                       | 2188                              |
| Control | 40         | IEL    | 17  | F   | DQ2/DQ8 <sup>neg</sup> |                       | 273                               |
| Control | 40         | PBL    | 17  | F   | DQ2/DQ8 <sup>neg</sup> |                       | 4542                              |
| Control | 53         | IEL    | 10  | F   | DQ8/DQX                |                       | 1456                              |
| Control | 53         | PBL    | 10  | F   | DQ8/DQX                |                       | 10000                             |
| Control | 110        | IEL    | 32  | M   | DQ8/DQ2.5              |                       | 257                               |
| Control | 110        | PBL    | 32  | M   | DQ8/DQ2.5              |                       | 4361                              |
| Control | 111        | IEL    | 38  | F   | DQ8/DQX                |                       | 257                               |
| Control | 111        | PBL    | 38  | F   | DQ8/DQX                |                       | 1183                              |
| Control | 144        | IEL    | 10  | M   | DQ8/DQX                |                       | 751                               |
| Control | 144        | PBL    | 10  | M   | DQ8/DQX                |                       | 1266                              |
| Control | 106        | IEL    | 54  | F   | DQ2/DQ8 <sup>neg</sup> |                       | 946                               |
| Control | 106        | PBL    | 54  | F   | DQ2/DQ8 <sup>neg</sup> |                       | NA                                |
| Active  | 22         | IEL    | 44  | M   | DQ2.5/DQX              |                       | 431                               |
| Active  | 22         | PBL    | 44  | M   | DQ2.5/DQX              |                       | 5000                              |
| Active  | 35         | IEL    | 11  | M   | DQ8/DQ2.5              |                       | 2238                              |
| Active  | 35         | PBL    | 11  | M   | DQ8/DQ2.5              |                       | 6591                              |
| Active  | 46         | IEL    | 19  | F   | DQ2.5/DQX              |                       | 5000                              |
| Active  | 46         | PBL    | 19  | F   | DQ2.5/DQX              |                       | 5000                              |
| Active  | 47         | IEL    | 13  | F   | DQ2.5/DQX              |                       | 10000                             |
| Active  | 47         | PBL    | 13  | F   | DQ2.5/DQX              |                       | 10000                             |
| Active  | 51         | IEL    | 51  | F   | DQ8/DQX                |                       | 10000                             |
| Active  | 51         | PBL    | 51  | F   | DQ8/DQX                |                       | 1394                              |
| Active  | 81         | IEL    | 30  | F   | DQ2.5/DQ2.2            |                       | 5000                              |
| Active  | 81         | PBL    | 30  | F   | DQ2.5/DQ2.2            |                       | 4012                              |
| Active  | 112        | IEL    | 37  | F   | DQ2.5/DQX              |                       | 3625                              |
| Active  | 112        | PBL    | 37  | F   | DQ2.5/DQX              |                       | 3625                              |
| Active  | 143        | IEL    | 16  | M   | DQ2.5/DQX              |                       | 2843                              |
| Active  | 143        | PBL    | 16  | M   | DQ2.5/DQX              |                       | 504                               |
| GFD     | 3          | IEL    | 53  | F   | DQ2.5/DQX              | 4                     | 5000                              |
| GFD     | 3          | PBL    | 53  | F   | DQ2.5/DQX              | 4                     | 5000                              |
| GFD     | 28         | IEL    | 37  | M   | DQ2.5/DQX              | 3                     | 1688                              |
| GFD     | 28         | PBL    | 37  | M   | DQ2.5/DQX              | 3                     | 1244                              |
| GFD     | 33         | IEL    | 55  | F   | DQ2.5/DQX              | 6                     | 1164                              |
| GFD     | 33         | PBL    | 55  | F   | DQ2.5/DQX              | 6                     | 3182                              |
| GFD     | 41         | IEL    | 37  | F   | DQ2.5/DQ2.5            | 2                     | 1945                              |
| GFD     | 41         | PBL    | 37  | F   | DQ2.5/DQ2.5            | 2                     | 2811                              |
| GFD     | 113        | IEL    | 29  | F   | DQ8/DQ2.5              | 4                     | 1356                              |
| GFD     | 113        | PBL    | 29  | F   | DQ8/DQ2.5              | 4                     | 1356                              |
| GFD     | 9          | IEL    | 17  | M   | DQ8/DQ2.5              | 3                     | 5640                              |
| GFD     | 9          | PBL    | 17  | M   | DQ8/DQ2.5              | 3                     | NA                                |
| GFD     | 43         | IEL    | 31  | F   | DQ2.5/DQ2.2            | 4                     | 3001                              |
| GFD     | 43         | PBL    | 31  | F   | DQ2.5/DQ2.2            | 4                     | NA                                |

**Table S6: Overlapping CDR3 sequences, Related to Figure 6**

| Group   | Patient ID | Tissue | Chain | TRV | CDR3                      | TRJ | Frequency |
|---------|------------|--------|-------|-----|---------------------------|-----|-----------|
| Active  | 35         | IEL    | TRD   | 1   | CALGDQRVPIPWTTGGYRHTDKLIF | 1   | 86.1702   |
| Active  | 46         | PBL    | TRD   | 1   | CALGDQRVPIPWTTGGYRHTDKLIF | 1   | 1.2658    |
| Active  | 51         | IEL    | TRD   | 1   | CALGEGFQRLGDCKLIF         | 1   | 2.7778    |
| Active  | 51         | PBL    | TRD   | 1   | CALGEGFQRLGDCKLIF         | 1   | 23.0769   |
| Active  | 143        | IEL    | TRD   | 1   | CALGGAPLGDTRKDKLIF        | 1   | 1.3333    |
| Active  | 143        | PBL    | TRD   | 1   | CALGGAPLGDTRKDKLIF        | 1   | 53.2468   |
| GFD     | 3          | IEL    | TRG   | 9   | CALWEVDYKKLF              | 1   | 5.1282    |
| GFD     | 3          | PBL    | TRG   | 9   | CALWEVDYKKLF              | 1   | 61.2500   |
| GFD     | 3          | PBL    | TRG   | 9   | CALWEVHYKKLF              | 2   | 1.2500    |
| Active  | 22         | PBL    | TRG   | 9   | CALWEVHYKKLF              | 1   | 7.2464    |
| GFD     | 33         | IEL    | TRG   | 9   | CALWEVLYKKLF              | 1   | 3.4091    |
| Active  | 46         | IEL    | TRG   | 9   | CALWEVLYKKLF              | 1   | 1.0870    |
| Active  | 51         | IEL    | TRG   | 9   | CALWEVLYKKLF              | 1   | 1.5873    |
| GFD     | 3          | IEL    | TRG   | 9   | CALWEVRYKKLF              | 1   | 2.5641    |
| GFD     | 4          | PBL    | TRG   | 9   | CALWEVRYKKLF              | 1   | 97.7778   |
| Active  | 51         | IEL    | TRG   | 9   | CALWEVRYKKLF              | 1   | 1.5873    |
| Active  | 81         | IEL    | TRG   | 9   | CALWEVRYKKLF              | 1   | 6.7416    |
| GFD     | 9          | IEL    | TRG   | 9   | CALWEVRYKKLF              | 1   | 7.9365    |
| Active  | 22         | PBL    | TRG   | 9   | CALWEVRYKKLF              | 1   | 1.4493    |
| GFD     | 28         | IEL    | TRG   | 3   | CATWDGGEKLF               | 1   | 98.8889   |
| GFD     | 41         | PBL    | TRG   | 2   | CATWDGGEKLF               | 1   | 25.7143   |
| Control | 106        | IEL    | TRG   | 4   | CATWDGGEKLF               | 1   | 86.9565   |
| GFD     | 3          | IEL    | TRG   | 2   | CATWDGLYKKLF              | 1   | 2.5641    |
| Active  | 112        | IEL    | TRG   | 4   | CATWDGLYKKLF              | 1   | 1.7544    |
| Active  | 35         | PBL    | TRG   | 4   | CATWDGPHYKKLF             | 1   | 43.9024   |
| Active  | 143        | IEL    | TRG   | 2   | CATWDGPHYKKLF             | 1   | 1.8868    |
| Active  | 22         | PBL    | TRG   | 2   | CATWDGPNYKKLF             | 1   | 4.3478    |
| Active  | 51         | IEL    | TRG   | 2   | CATWDGPNYKKLF             | 1   | 3.1746    |
| GFD     | 3          | IEL    | TRG   | 2   | CATWDGPNYKKLF             | 2   | 5.1282    |
| Active  | 46         | PBL    | TRG   | 2   | CATWDGPNYKKLF             | 2   | 1.5385    |
| Active  | 47         | PBL    | TRG   | 2   | CATWDGPRYYKKLF            | 1   | 56.7568   |
| Active  | 143        | PBL    | TRG   | 4   | CATWDGPRYYKKLF            | 1   | 6.5217    |
| Control | 13         | PBL    | TRG   | 4   | CATWDGQGYKKLF             | 2   | 11.1111   |
| Active  | 51         | IEL    | TRG   | 2   | CATWDGQGYKKLF             | 1   | 1.5873    |
| Active  | 143        | IEL    | TRG   | 4   | CATWDGRGSDWIKTF           | P2  | 1.8868    |
| Control | 144        | IEL    | TRG   | 4   | CATWDGRGSDWIKTF           | P2  | 2.8986    |
| Control | 53         | IEL    | TRG   | 4   | CATWDGRTTGWFKIF           | P1  | 5.2632    |
| Control | 144        | PBL    | TRG   | 8   | CATWDGRTTGWFKIF           | P1  | 2.4390    |
| Active  | 51         | PBL    | TRG   | 2   | CATWDGTNYKKLF             | 1   | 12.5000   |

|         |     |     |     |   |                |    |         |
|---------|-----|-----|-----|---|----------------|----|---------|
| Control | 144 | IEL | TRG | 4 | CATWDGTNYYKKLF | 2  | 2.8986  |
| Control | 13  | PBL | TRG | 2 | CATWDGYKKLF    | 1  | 4.7619  |
| GFD     | 41  | IEL | TRG | 2 | CATWDGYKKLF    | 1  | 8.6207  |
| Active  | 81  | PBL | TRG | 2 | CATWDGYKKLF    | 1  | 32.7586 |
| GFD     | 3   | IEL | TRG | 2 | CATWDGYKKLF    | 1  | 1.2821  |
| Control | 13  | PBL | TRG | 2 | CATWDGYKKLF    | 1  | 7.9365  |
| GFD     | 41  | IEL | TRG | 2 | CATWDGYKKLF    | 1  | 5.1724  |
| Active  | 143 | PBL | TRG | 2 | CATWDGYKKLF    | 1  | 28.2609 |
| Active  | 143 | IEL | TRG | 4 | CATWDGYKKLF    | 1  | 3.7736  |
| Active  | 47  | IEL | TRG | 8 | CATWDNYKKLF    | 1  | 14.0625 |
| Active  | 112 | PBL | TRG | 8 | CATWDNYKKLF    | 1  | 5.1282  |
| GFD     | 33  | IEL | TRG | 4 | CATWDPPYYKKLF  | 1  | 1.1364  |
| GFD     | 41  | PBL | TRG | 3 | CATWDPPYYKKLF  | 1  | 18.5714 |
| Active  | 46  | PBL | TRG | 5 | CATWDRHYKKLF   | 1  | 44.6154 |
| Active  | 51  | IEL | TRG | 2 | CATWDRHYKKLF   | 1  | 1.5873  |
| GFD     | 3   | IEL | TRG | 3 | CATWDRPEKLF    | 1  | 2.5641  |
| GFD     | 33  | IEL | TRG | 3 | CATWDRPEKLF    | 1  | 3.4091  |
| Active  | 143 | IEL | TRG | 3 | CATWDRPEKLF    | 1  | 1.8868  |
| GFD     | 3   | IEL | TRG | 5 | CATWDRPGYKKLF  | 1  | 1.2821  |
| Control | 111 | PBL | TRG | 5 | CATWDRPGYKKLF  | 1  | 1.7241  |
| Control | 53  | PBL | TRG | 3 | CATWDSPNYYKKLF | 2  | 18.7500 |
| Active  | 112 | IEL | TRG | 3 | CATWDSPNYYKKLF | 2  | 1.7544  |
| GFD     | 113 | IEL | TRG | 4 | CATWDTTGWFKIF  | P1 | 10.7692 |
| Active  | 143 | PBL | TRG | 8 | CATWDTTGWFKIF  | P1 | 4.3478  |
| GFD     | 4   | PBL | TRG | 8 | CATWDYYKKLF    | 1  | 1.1111  |
| GFD     | 28  | PBL | TRG | 4 | CATWDYYKKLF    | 1  | 43.5294 |
| Active  | 51  | PBL | TRG | 8 | CATWDYYKKLF    | 1  | 6.9444  |
| Control | 110 | PBL | TRG | 5 | CATWDYYKKLF    | 1  | 13.7255 |
| GFD     | 113 | PBL | TRG | 3 | CATWGRLYYKKLF  | 1  | 1.9608  |
| Control | 144 | PBL | TRG | 8 | CATWGRLYYKKLF  | 1  | 4.8780  |
| Active  | 47  | IEL | TRG | 4 | CATWSHYKKLF    | 1  | 28.1250 |
| Active  | 51  | IEL | TRG | 3 | CATWSHYKKLF    | 1  | 3.1746  |
| GFD     | 3   | IEL | TRG | 8 | CATWVYYKKLF    | 1  | 1.2821  |
| GFD     | 4   | IEL | TRG | 5 | CATWVYYKKLF    | 1  | 11.7647 |
| GFD     | 41  | IEL | TRG | 4 | CATWVYYKKLF    | 1  | 3.4483  |
