# Supplementary material
Source: PubMed Central journal article supplement (PMC6667191)
Supplement: NIHMS1030275-supplement-Table_S4.pdf [file NIHMS1030275-supplement-Table_S4.pdf]

|        |    |     |     |     |    |
|--------|----|-----|-----|-----|----|
| Active | 35 | PBL | VD1 | TRD | 1  |
| Active | 35 | PBL | VD1 | TRD | 1  |
| Active | 35 | PBL | VD1 | TRD | 1  |
| Active | 35 | PBL | VD1 | TRD | 1  |
| Active | 35 | PBL | VD1 | TRD | 1  |
| Active | 35 | PBL | VD1 | TRD | 1  |
| Active | 35 | PBL | VD1 | TRD | 1  |
| Active | 35 | PBL | VD1 | TRG | 9  |
| Active | 35 | PBL | VD1 | TRD | 1  |
| Active | 35 | PBL | VD1 | TRG | 9  |
| Active | 35 | PBL | VD1 | TRG | 10 |
| Active | 46 | IEL | VD1 | TRG | 5  |
| Active | 46 | IEL | VD1 | TRG | 5  |
| Active | 46 | IEL | VD1 | TRG | 5  |
| Active | 46 | IEL | VD1 | TRG | 3  |
| Active | 46 | IEL | VD1 | TRG | 3  |
| Active | 46 | IEL | VD1 | TRG | 3  |
| Active | 46 | IEL | VD1 | TRG | 3  |
| Active | 46 | IEL | VD1 | TRG | 3  |
| Active | 46 | IEL | VD1 | TRG | 9  |
| Active | 46 | PBL | VD1 | TRG | 9  |
| Active | 46 | PBL | VD1 | TRG | 5  |
| Active | 46 | PBL | VD1 | TRG | 5  |
| Active | 46 | PBL | VD1 | TRG | 5  |
| Active | 46 | PBL | VD1 | TRG | 4  |
| Active | 46 | IEL | VD1 | TRD | 1  |
| Active | 46 | IEL | VD1 | TRD | 1  |
| Active | 46 | IEL | VD1 | TRD | 1  |
| Active | 46 | IEL | VD1 | TRD | 1  |
| Active | 46 | IEL | VD1 | TRD | 1  |
| Active | 46 | IEL | VD1 | TRD | 1  |
| Active | 46 | IEL | VD1 | TRD | 1  |
| Active | 46 | IEL | VD1 | TRD | 1  |
| Active | 46 | IEL | VD1 | TRD | 1  |
| Active | 46 | IEL | VD1 | TRD | 1  |
| Active | 46 | IEL | VD1 | TRD | 1  |
| Active | 46 | IEL | VD1 | TRD | 1  |
| Active | 46 | IEL | VD1 | TRD | 1  |
| Active | 46 | IEL | VD1 | TRD | 1  |
| Active | 46 | PBL | VD1 | TRD | 1  |
| Active | 46 | PBL | VD1 | TRD | 1  |
| Active | 46 | PBL | VD1 | TRD | 1  |
| Active | 46 | PBL | VD1 | TRD | 1  |
| Active | 46 | PBL | VD1 | TRD | 1  |
| Active | 46 | PBL | VD1 | TRD | 1  |
| Active | 46 | PBL | VD1 | TRD | 1  |
| Active | 46 | PBL | VD1 | TRD | 1  |
| Active | 46 | PBL | VD1 | TRD | 1  |
| Active | 46 | PBL | VD1 | TRD | 1  |
| Active | 46 | PBL | VD1 | TRG | 2  |
| Active | 46 | PBL | VD1 | TRD | 1  |
| Active | 46 | PBL | VD1 | TRD | 1  |
| Active | 46 | PBL | VD1 | TRG | 5  |
| Active | 46 | PBL | VD1 | TRG | 5  |
| Active | 46 | PBL | VD1 | TRG | 10 |
| Active | 46 | PBL | VD1 | TRG | 10 |
| Active | 47 | IEL | VD1 | TRG | 9  |
| Active | 47 | IEL | VD1 | TRG | 9  |
| Active | 47 | IEL | VD1 | TRG | 8  |
| Active | 47 | IEL | VD1 | TRG | 8  |
| Active | 47 | IEL | VD1 | TRG | 4  |
| Active | 47 | IEL | VD1 | TRG | 9  |
| Active | 47 | IEL | VD1 | TRG | 8  |
| Active | 47 | IEL | VD1 | TRG | 8  |

|        |    |     |     |     |   |
|--------|----|-----|-----|-----|---|
| Active | 47 | IEL | VD1 | TRG | 8 |
| Active | 47 | IEL | VD1 | TRG | 4 |
| Active | 47 | IEL | VD1 | TRG | 4 |
| Active | 47 | IEL | VD1 | TRG | 8 |
| Active | 47 | IEL | VD1 | TRG | 8 |
| Active | 47 | PBL | VD1 | TRG | 4 |
| Active | 47 | PBL | VD1 | TRG | 4 |
| Active | 47 | IEL | VD1 | TRD | 1 |
| Active | 47 | IEL | VD1 | TRD | 1 |
| Active | 47 | IEL | VD1 | TRD | 1 |
| Active | 47 | IEL | VD1 | TRD | 1 |
| Active | 47 | IEL | VD1 | TRD | 1 |
| Active | 47 | IEL | VD1 | TRD | 1 |
| Active | 47 | IEL | VD1 | TRD | 1 |
| Active | 47 | IEL | VD1 | TRD | 1 |
| Active | 47 | IEL | VD1 | TRD | 1 |
| Active | 47 | IEL | VD1 | TRD | 1 |
| Active | 47 | IEL | VD1 | TRD | 1 |
| Active | 47 | IEL | VD1 | TRD | 1 |
| Active | 47 | IEL | VD1 | TRD | 1 |
| Active | 47 | IEL | VD1 | TRD | 1 |
| Active | 47 | IEL | VD1 | TRD | 1 |
| Active | 47 | IEL | VD1 | TRD | 1 |
| Active | 47 | IEL | VD1 | TRD | 1 |
| Active | 47 | IEL | VD1 | TRD | 1 |
| Active | 47 | IEL | VD1 | TRD | 1 |
| Active | 47 | IEL | VD1 | TRD | 1 |
| Active | 47 | IEL | VD1 | TRD | 1 |
| Active | 47 | IEL | VD1 | TRD | 1 |
| Active | 47 | IEL | VD1 | TRD | 1 |
| Active | 47 | PBL | VD1 | TRD | 1 |
| Active | 47 | IEL | VD1 | TRD | 1 |
| Active | 47 | IEL | VD1 | TRD | 1 |
| Active | 47 | IEL | VD1 | TRD | 1 |
| Active | 47 | PBL | VD1 | TRD | 1 |
| Active | 47 | PBL | VD1 | TRD | 1 |
| Active | 47 | PBL | VD1 | TRG | 4 |
| Active | 47 | PBL | VD1 | TRG | 2 |
| Active | 51 | IEL | VD1 | TRG | 9 |
| Active | 51 | IEL | VD1 | TRG | 5 |
| Active | 51 | IEL | VD1 | TRG | 4 |
| Active | 51 | IEL | VD1 | TRG | 4 |
| Active | 51 | IEL | VD1 | TRG | 4 |
| Active | 51 | IEL | VD1 | TRG | 4 |
| Active | 51 | IEL | VD1 | TRG | 4 |
| Active | 51 | IEL | VD1 | TRG | 4 |
| Active | 51 | IEL | VD1 | TRG | 4 |
| Active | 51 | IEL | VD1 | TRG | 3 |
| Active | 51 | IEL | VD1 | TRG | 3 |
| Active | 51 | IEL | VD1 | TRG | 3 |
| Active | 51 | IEL | VD1 | TRG | 3 |
| Active | 51 | IEL | VD1 | TRG | 2 |
| Active | 51 | IEL | VD1 | TRG | 2 |
| Active | 51 | IEL | VD1 | TRG | 2 |
| Active | 51 | IEL | VD1 | TRG | 2 |
| Active | 51 | IEL | VD1 | TRG | 2 |





|        |     |     |     |     |            |
|--------|-----|-----|-----|-----|------------|
| Active | 81  | PBL | VD1 | TRG | 9          |
| Active | 81  | PBL | VD1 | TRG | 9          |
| Active | 81  | IEL | VD1 | TRD | 1          |
| Active | 81  | IEL | VD1 | TRD | 1          |
| Active | 81  | IEL | VD1 | TRD | 1          |
| Active | 81  | IEL | VD1 | TRD | 1          |
| Active | 81  | IEL | VD1 | TRD | 1          |
| Active | 81  | PBL | VD1 | TRD | 1          |
| Active | 81  | PBL | VD1 | TRD | 1          |
| Active | 81  | PBL | VD1 | TRD | 1          |
| Active | 81  | PBL | VD1 | TRD | 1          |
| Active | 81  | PBL | VD1 | TRG | 2          |
| Active | 81  | PBL | VD1 | TRG | 2          |
| Active | 112 | IEL | VD1 | TRG | 10         |
| Active | 112 | IEL | VD1 | TRG | 10         |
| Active | 112 | IEL | VD1 | TRG | 9          |
| Active | 112 | IEL | VD1 | TRG | 9          |
| Active | 112 | IEL | VD1 | TRG | 5          |
| Active | 112 | IEL | VD1 | TRG | 5          |
| Active | 112 | IEL | VD1 | TRG | 4          |
| Active | 112 | IEL | VD1 | TRG | 4          |
| Active | 112 | IEL | VD1 | TRG | 4          |
| Active | 112 | IEL | VD1 | TRG | 4          |
| Active | 112 | IEL | VD1 | TRG | 4          |
| Active | 112 | IEL | VD1 | TRG | 4          |
| Active | 112 | IEL | VD1 | TRG | 4          |
| Active | 112 | IEL | VD1 | TRG | 3          |
| Active | 112 | IEL | VD1 | TRG | 3          |
| Active | 112 | IEL | VD1 | TRG | 3          |
| Active | 112 | IEL | VD1 | TRG | 3          |
| Active | 112 | IEL | VD1 | TRG | 3          |
| Active | 112 | IEL | VD1 | TRG | 3          |
| Active | 112 | IEL | VD1 | TRG | 2          |
| Active | 112 | IEL | VD1 | TRG | 4          |
| Active | 112 | IEL | VD1 | TRG | 3          |
| Active | 112 | IEL | VD1 | TRG | 10         |
| Active | 112 | IEL | VD1 | TRG | 10         |
| Active | 112 | IEL | VD1 | TRG | 9          |
| Active | 112 | IEL | VD1 | TRG | 8          |
| Active | 112 | IEL | VD1 | TRG | 8          |
| Active | 112 | IEL | VD1 | TRG | 5          |
| Active | 112 | IEL | VD1 | TRG | 5          |
| Active | 112 | IEL | VD1 | TRG | 4          |
| Active | 112 | IEL | VD1 | TRG | 4          |
| Active | 112 | IEL | VD1 | TRG | 4          |
| Active | 112 | IEL | VD1 | TRG | 4          |
| Active | 112 | IEL | VD1 | TRG | 2          |
| Active | 112 | IEL | VD1 | TRD | TRAV29/DV5 |
| Active | 112 | IEL | VD1 | TRD | TRAV29/DV5 |
| Active | 112 | PBL | VD1 | TRG | 9          |
| Active | 112 | PBL | VD1 | TRG | 9          |
| Active | 112 | PBL | VD1 | TRG | 9          |
| Active | 112 | PBL | VD1 | TRG | 8          |
| Active | 112 | PBL | VD1 | TRG | 3          |
| Active | 112 | PBL | VD1 | TRG | 2          |
| Active | 112 | PBL | VD1 | TRG | 2          |
| Active | 112 | IEL | VD1 | TRD | 1          |
| Active | 112 | IEL | VD1 | TRD | 1          |
| Active | 112 | IEL | VD1 | TRD | 1          |
| Active | 112 | IEL | VD1 | TRD | 1          |
| Active | 112 | IEL | VD1 | TRD | 1          |







|         |     |     |     |     |   |
|---------|-----|-----|-----|-----|---|
| Active  | 143 | IEL | VD1 | TRD | 1 |
| Active  | 143 | IEL | VD1 | TRD | 1 |
| Active  | 143 | IEL | VD1 | TRD | 1 |
| Active  | 143 | IEL | VD1 | TRD | 1 |
| Active  | 143 | IEL | VD1 | TRD | 1 |
| Active  | 143 | IEL | VD1 | TRD | 1 |
| Active  | 143 | IEL | VD1 | TRD | 1 |
| Active  | 143 | IEL | VD1 | TRD | 1 |
| Active  | 143 | IEL | VD1 | TRD | 1 |
| Active  | 143 | IEL | VD1 | TRD | 1 |
| Active  | 143 | IEL | VD1 | TRD | 1 |
| Active  | 143 | IEL | VD1 | TRD | 1 |
| Active  | 143 | IEL | VD1 | TRD | 1 |
| Active  | 143 | IEL | VD1 | TRD | 1 |
| Active  | 143 | IEL | VD1 | TRD | 1 |
| Active  | 143 | IEL | VD1 | TRD | 1 |
| Active  | 143 | PBL | VD1 | TRD | 1 |
| Active  | 143 | PBL | VD1 | TRD | 1 |
| Active  | 143 | PBL | VD1 | TRD | 1 |
| Active  | 143 | PBL | VD1 | TRD | 1 |
| Active  | 143 | PBL | VD1 | TRD | 1 |
| Active  | 143 | PBL | VD1 | TRD | 1 |
| Active  | 143 | PBL | VD1 | TRD | 1 |
| Active  | 143 | PBL | VD1 | TRD | 1 |
| Active  | 143 | PBL | VD1 | TRD | 1 |
| Active  | 143 | PBL | VD1 | TRD | 1 |
| Active  | 143 | PBL | VD1 | TRD | 1 |
| Active  | 143 | PBL | VD1 | TRG | 5 |
| Active  | 143 | PBL | VD1 | TRD | 2 |
| Active  | 143 | IEL | VD1 | TRD | 1 |
| Active  | 143 | PBL | VD1 | TRG | 8 |
| Control | 7   | PBL | VD1 | TRG | 9 |
| Control | 7   | PBL | VD1 | TRG | 9 |
| Control | 7   | PBL | VD1 | TRD | 2 |
| Control | 7   | IEL | VD1 | TRD | 1 |
| Control | 7   | IEL | VD1 | TRD | 1 |
| Control | 7   | IEL | VD1 | TRD | 1 |
| Control | 7   | IEL | VD1 | TRD | 1 |
| Control | 7   | IEL | VD1 | TRD | 1 |
| Control | 7   | IEL | VD1 | TRD | 1 |
| Control | 7   | IEL | VD1 | TRD | 1 |
| Control | 7   | IEL | VD1 | TRD | 1 |
| Control | 7   | IEL | VD1 | TRD | 1 |
| Control | 7   | IEL | VD1 | TRD | 1 |
| Control | 7   | IEL | VD1 | TRD | 1 |
| Control | 7   | IEL | VD1 | TRD | 1 |
| Control | 7   | IEL | VD1 | TRD | 1 |
| Control | 7   | IEL | VD1 | TRD | 1 |
| Control | 7   | IEL | VD1 | TRD | 1 |
| Control | 7   | IEL | VD1 | TRD | 1 |
| Control | 7   | PBL | VD1 | TRD | 1 |
| Control | 7   | PBL | VD1 | TRD | 1 |
| Control | 7   | PBL | VD1 | TRD | 1 |
| Control | 7   | PBL | VD1 | TRD | 1 |
| Control | 7   | PBL | VD1 | TRD | 1 |
| Control | 7   | PBL | VD1 | TRD | 1 |
| Control | 7   | PBL | VD1 | TRD | 1 |
| Control | 7   | PBL | VD1 | TRD | 1 |
| Control | 7   | PBL | VD1 | TRG | 9 |
| Control | 7   | PBL | VD1 | TRG | 9 |
| Control | 7   | IEL | VD1 | TRG | 4 |
| Control | 7   | IEL | VD1 | TRG | 4 |
| Control | 13  | PBL | VD1 | TRG | 9 |
| Control | 13  | PBL | VD1 | TRG | 9 |
| Control | 13  | PBL | VD1 | TRG | 9 |









|         |     |     |     |     |    |
|---------|-----|-----|-----|-----|----|
| Control | 110 | PBL | VD1 | TRD | 1  |
| Control | 110 | PBL | VD1 | TRD | 1  |
| Control | 110 | PBL | VD1 | TRD | 1  |
| Control | 110 | PBL | VD1 | TRD | 1  |
| Control | 110 | PBL | VD1 | TRD | 1  |
| Control | 110 | PBL | VD1 | TRD | 1  |
| Control | 110 | PBL | VD1 | TRD | 1  |
| Control | 110 | PBL | VD1 | TRD | 1  |
| Control | 110 | PBL | VD1 | TRD | 1  |
| Control | 110 | PBL | VD1 | TRD | 1  |
| Control | 110 | PBL | VD1 | TRG | 3  |
| Control | 110 | PBL | VD1 | TRG | 10 |
| Control | 110 | PBL | VD1 | TRG | 4  |
| Control | 110 | PBL | VD1 | TRG | 9  |
| Control | 110 | PBL | VD1 | TRG | 8  |
| Control | 110 | PBL | VD1 | TRG | 8  |
| Control | 111 | IEL | VD1 | TRG | 9  |
| Control | 111 | IEL | VD1 | TRG | 2  |
| Control | 111 | IEL | VD1 | TRG | 4  |
| Control | 111 | IEL | VD1 | TRG | 8  |
| Control | 111 | IEL | VD1 | TRG | 5  |
| Control | 111 | IEL | VD1 | TRG | 9  |
| Control | 111 | IEL | VD1 | TRG | 9  |
| Control | 111 | IEL | VD1 | TRG | 10 |
| Control | 111 | IEL | VD1 | TRG | 8  |
| Control | 111 | PBL | VD1 | TRG | 9  |
| Control | 111 | PBL | VD1 | TRG | 5  |
| Control | 111 | PBL | VD1 | TRG | 4  |
| Control | 111 | IEL | VD1 | TRD | 1  |
| Control | 111 | IEL | VD1 | TRD | 1  |
| Control | 111 | IEL | VD1 | TRD | 1  |
| Control | 111 | IEL | VD1 | TRD | 1  |
| Control | 111 | IEL | VD1 | TRD | 1  |
| Control | 111 | IEL | VD1 | TRD | 1  |
| Control | 111 | IEL | VD1 | TRD | 1  |
| Control | 111 | IEL | VD1 | TRD | 1  |
| Control | 111 | IEL | VD1 | TRD | 1  |
| Control | 111 | IEL | VD1 | TRD | 1  |
| Control | 111 | PBL | VD1 | TRD | 1  |
| Control | 111 | PBL | VD1 | TRD | 1  |
| Control | 111 | PBL | VD1 | TRD | 1  |
| Control | 111 | PBL | VD1 | TRD | 1  |
| Control | 111 | PBL | VD1 | TRD | 1  |
| Control | 111 | PBL | VD1 | TRD | 1  |
| Control | 111 | PBL | VD1 | TRD | 1  |
| Control | 111 | PBL | VD1 | TRD | 1  |
| Control | 111 | PBL | VD1 | TRD | 1  |
| Control | 111 | PBL | VD1 | TRG | 4  |
| Control | 111 | PBL | VD1 | TRG | 3  |
| Control | 111 | PBL | VD1 | TRG | 5  |
| Control | 111 | PBL | VD1 | TRG | 3  |
| Control | 111 | PBL | VD1 | TRG | 9  |
| Control | 111 | PBL | VD1 | TRG | 9  |
| Control | 111 | PBL | VD1 | TRG | 10 |
| Control | 144 | IEL | VD1 | TRG | 9  |
| Control | 144 | IEL | VD1 | TRG | 9  |
| Control | 144 | IEL | VD1 | TRG | 9  |
| Control | 144 | IEL | VD1 | TRG | 9  |
| Control | 144 | IEL | VD1 | TRG | 8  |
| Control | 144 | IEL | VD1 | TRG | 4  |









|     |   |     |     |     |    |
|-----|---|-----|-----|-----|----|
| GFD | 3 | PBL | VD1 | TRG | 9  |
| GFD | 3 | IEL | VD1 | TRD | 1  |
| GFD | 3 | PBL | VD1 | TRG | 9  |
| GFD | 3 | PBL | VD1 | TRG | 9  |
| GFD | 3 | PBL | VD1 | TRG | 8  |
| GFD | 3 | PBL | VD1 | TRG | 9  |
| GFD | 3 | PBL | VD1 | TRG | 9  |
| GFD | 3 | PBL | VD1 | TRG | 2  |
| GFD | 3 | IEL | VD1 | TRG | 10 |
| GFD | 3 | IEL | VD1 | TRG | 9  |
| GFD | 3 | IEL | VD1 | TRG | 9  |
| GFD | 3 | IEL | VD1 | TRG | 9  |
| GFD | 3 | IEL | VD1 | TRG | 9  |
| GFD | 3 | IEL | VD1 | TRG | 9  |
| GFD | 3 | IEL | VD1 | TRG | 9  |
| GFD | 3 | IEL | VD1 | TRG | 8  |
| GFD | 3 | IEL | VD1 | TRG | 5  |
| GFD | 3 | IEL | VD1 | TRG | 4  |
| GFD | 3 | IEL | VD1 | TRG | 3  |
| GFD | 3 | IEL | VD1 | TRG | 3  |
| GFD | 3 | IEL | VD1 | TRG | 3  |
| GFD | 3 | IEL | VD1 | TRG | 3  |
| GFD | 3 | IEL | VD1 | TRG | 3  |
| GFD | 3 | IEL | VD1 | TRG | 2  |
| GFD | 3 | IEL | VD1 | TRG | 2  |
| GFD | 3 | IEL | VD1 | TRG | 2  |
| GFD | 3 | IEL | VD1 | TRG | 2  |
| GFD | 3 | IEL | VD1 | TRG | 2  |
| GFD | 3 | IEL | VD1 | TRG | 2  |
| GFD | 3 | IEL | VD1 | TRG | 2  |
| GFD | 3 | IEL | VD1 | TRG | 9  |
| GFD | 3 | IEL | VD1 | TRG | 3  |
| GFD | 3 | IEL | VD1 | TRG | 3  |
| GFD | 3 | IEL | VD1 | TRG | 3  |
| GFD | 3 | IEL | VD1 | TRG | 3  |
| GFD | 3 | IEL | VD1 | TRG | 2  |
| GFD | 3 | IEL | VD1 | TRG | 9  |
| GFD | 3 | IEL | VD1 | TRG | 3  |
| GFD | 3 | IEL | VD1 | TRG | 3  |
| GFD | 3 | IEL | VD1 | TRG | 3  |
| GFD | 3 | IEL | VD1 | TRG | 9  |
| GFD | 3 | IEL | VD1 | TRG | 3  |
| GFD | 3 | IEL | VD1 | TRG | 9  |
| GFD | 3 | IEL | VD1 | TRG | 8  |
| GFD | 3 | IEL | VD1 | TRG | 3  |
| GFD | 3 | IEL | VD1 | TRG | 9  |
| GFD | 3 | IEL | VD1 | TRG | 9  |
| GFD | 3 | IEL | VD1 | TRG | 9  |
| GFD | 3 | IEL | VD1 | TRG | 8  |
| GFD | 3 | IEL | VD1 | TRG | 4  |
| GFD | 3 | IEL | VD1 | TRG | 3  |
| GFD | 9 | IEL | VD1 | TRD | 3  |
| GFD | 9 | IEL | VD1 | TRD | 3  |
| GFD | 9 | IEL | VD1 | TRD | 1  |
| GFD | 9 | IEL | VD1 | TRD | 1  |
| GFD | 9 | IEL | VD1 | TRD | 1  |
| GFD | 9 | IEL | VD1 | TRD | 1  |
| GFD | 9 | IEL | VD1 | TRD | 1  |





















|        |    |     |         |     |    |
|--------|----|-----|---------|-----|----|
| Active | 46 | IEL | VD1_neg | TRG | 2  |
| Active | 46 | IEL | VD1_neg | TRG | 3  |
| Active | 46 | IEL | VD1_neg | TRG | 10 |
| Active | 46 | IEL | VD1_neg | TRG | 2  |
| Active | 46 | IEL | VD1_neg | TRG | 2  |
| Active | 46 | IEL | VD1_neg | TRG | 3  |
| Active | 46 | IEL | VD1_neg | TRG | 4  |
| Active | 46 | IEL | VD1_neg | TRG | 9  |
| Active | 46 | IEL | VD1_neg | TRG | 5  |
| Active | 46 | IEL | VD1_neg | TRG | 4  |
| Active | 46 | IEL | VD1_neg | TRG | 4  |
| Active | 46 | IEL | VD1_neg | TRG | 4  |
| Active | 46 | IEL | VD1_neg | TRG | 3  |
| Active | 46 | IEL | VD1_neg | TRG | 4  |
| Active | 46 | IEL | VD1_neg | TRG | 2  |
| Active | 46 | IEL | VD1_neg | TRG | 2  |
| Active | 46 | IEL | VD1_neg | TRG | 4  |
| Active | 46 | IEL | VD1_neg | TRG | 4  |
| Active | 46 | IEL | VD1_neg | TRG | 4  |
| Active | 46 | IEL | VD1_neg | TRG | 4  |
| Active | 46 | IEL | VD1_neg | TRG | 3  |
| Active | 46 | IEL | VD1_neg | TRG | 8  |
| Active | 46 | IEL | VD1_neg | TRD | 1  |
| Active | 46 | IEL | VD1_neg | TRD | 1  |
| Active | 46 | IEL | VD1_neg | TRD | 1  |
| Active | 47 | IEL | VD1_neg | TRD | 1  |
| Active | 47 | IEL | VD1_neg | TRD | 1  |
| Active | 47 | IEL | VD1_neg | TRD | 1  |
| Active | 47 | IEL | VD1_neg | TRD | 1  |
| Active | 47 | IEL | VD1_neg | TRD | 1  |
| Active | 47 | IEL | VD1_neg | TRD | 1  |
| Active | 47 | IEL | VD1_neg | TRD | 1  |
| Active | 47 | IEL | VD1_neg | TRD | 1  |
| Active | 47 | IEL | VD1_neg | TRD | 1  |
| Active | 47 | IEL | VD1_neg | TRG | 2  |
| Active | 47 | IEL | VD1_neg | TRG | 9  |
| Active | 47 | IEL | VD1_neg | TRG | 2  |
| Active | 47 | IEL | VD1_neg | TRG | 9  |
| Active | 47 | IEL | VD1_neg | TRG | 9  |
| Active | 47 | IEL | VD1_neg | TRG | 3  |
| Active | 47 | IEL | VD1_neg | TRG | 9  |
| Active | 47 | IEL | VD1_neg | TRG | 9  |
| Active | 47 | IEL | VD1_neg | TRG | 2  |
| Active | 47 | IEL | VD1_neg | TRG | 9  |
| Active | 47 | IEL | VD1_neg | TRG | 9  |
| Active | 47 | IEL | VD1_neg | TRG | 8  |
| Active | 47 | IEL | VD1_neg | TRG | 8  |
| Active | 47 | IEL | VD1_neg | TRG | 8  |
| Active | 47 | IEL | VD1_neg | TRG | 2  |
| Active | 47 | IEL | VD1_neg | TRG | 9  |
| Active | 47 | IEL | VD1_neg | TRG | 9  |
| Active | 47 | IEL | VD1_neg | TRG | 8  |
| Active | 47 | IEL | VD1_neg | TRG | 4  |
| Active | 47 | IEL | VD1_neg | TRG | 2  |
| Active | 47 | IEL | VD1_neg | TRG | 10 |
| Active | 47 | IEL | VD1_neg | TRG | 9  |
| Active | 47 | IEL | VD1_neg | TRG | 4  |
| Active | 47 | IEL | VD1_neg | TRG | 4  |
| Active | 47 | IEL | VD1_neg | TRG | 4  |
| Active | 47 | IEL | VD1_neg | TRG | 4  |
| Active | 47 | IEL | VD1_neg | TRG | 2  |

|        |    |     |         |     |             |
|--------|----|-----|---------|-----|-------------|
| Active | 47 | IEL | VD1_neg | TRG | 4           |
| Active | 47 | IEL | VD1_neg | TRG | 4           |
| Active | 47 | IEL | VD1_neg | TRG | 3           |
| Active | 47 | IEL | VD1_neg | TRG | 3           |
| Active | 47 | IEL | VD1_neg | TRG | 2           |
| Active | 47 | IEL | VD1_neg | TRG | 4           |
| Active | 47 | IEL | VD1_neg | TRG | 9           |
| Active | 81 | IEL | VD1_neg | TRD | TRAV38-2/DV |
| Active | 81 | IEL | VD1_neg | TRD | 2           |
| Active | 81 | IEL | VD1_neg | TRD | TRAV22      |
| Active | 81 | IEL | VD1_neg | TRD | 3           |
| Active | 81 | IEL | VD1_neg | TRD | 3           |
| Active | 81 | IEL | VD1_neg | TRD | 3           |
| Active | 81 | IEL | VD1_neg | TRD | 1           |
| Active | 81 | IEL | VD1_neg | TRD | 1           |
| Active | 81 | IEL | VD1_neg | TRD | 3           |
| Active | 81 | IEL | VD1_neg | TRD | TRAV38-2/DV |
| Active | 81 | IEL | VD1_neg | TRD | 3           |
| Active | 81 | IEL | VD1_neg | TRD | 2           |
| Active | 81 | IEL | VD1_neg | TRD | 3           |
| Active | 81 | IEL | VD1_neg | TRD | 3           |
| Active | 81 | IEL | VD1_neg | TRD | 3           |
| Active | 81 | IEL | VD1_neg | TRD | TRAV38-2/DV |
| Active | 81 | IEL | VD1_neg | TRD | 3           |
| Active | 81 | IEL | VD1_neg | TRD | 3           |
| Active | 81 | IEL | VD1_neg | TRD | 3           |
| Active | 81 | IEL | VD1_neg | TRD | 3           |
| Active | 81 | IEL | VD1_neg | TRD | 3           |
| Active | 81 | IEL | VD1_neg | TRD | TRAV14/DV4  |
| Active | 81 | IEL | VD1_neg | TRD | TRAV38-2/DV |
| Active | 81 | IEL | VD1_neg | TRD | 3           |
| Active | 81 | IEL | VD1_neg | TRD | 3           |
| Active | 81 | IEL | VD1_neg | TRD | 3           |
| Active | 81 | IEL | VD1_neg | TRD | 3           |
| Active | 81 | IEL | VD1_neg | TRD | TRAV38-2/DV |
| Active | 81 | IEL | VD1_neg | TRD | 2           |
| Active | 81 | IEL | VD1_neg | TRD | 3           |
| Active | 81 | IEL | VD1_neg | TRD | 3           |
| Active | 81 | IEL | VD1_neg | TRD | 1           |
| Active | 81 | IEL | VD1_neg | TRD | 3           |
| Active | 81 | IEL | VD1_neg | TRD | 3           |
| Active | 81 | IEL | VD1_neg | TRD | 3           |
| Active | 81 | IEL | VD1_neg | TRD | TRAV29/DV5  |
| Active | 81 | IEL | VD1_neg | TRD | 1           |
| Active | 81 | IEL | VD1_neg | TRD | 3           |
| Active | 81 | IEL | VD1_neg | TRD | 3           |
| Active | 81 | IEL | VD1_neg | TRD | TRAV29/DV5  |
| Active | 81 | IEL | VD1_neg | TRD | 2           |
| Active | 81 | IEL | VD1_neg | TRD | 3           |
| Active | 81 | IEL | VD1_neg | TRD | 3           |
| Active | 81 | IEL | VD1_neg | TRD | TRAV24      |
| Active | 81 | IEL | VD1_neg | TRD | 2           |
| Active | 81 | IEL | VD1_neg | TRD | 3           |
| Active | 81 | IEL | VD1_neg | TRD | TRAV38-2/DV |
| Active | 81 | IEL | VD1_neg | TRD | 2           |
| Active | 81 | IEL | VD1_neg | TRD | 3           |
| Active | 81 | IEL | VD1_neg | TRD | TRAV29/DV5  |
| Active | 81 | IEL | VD1_neg | TRD | 3           |
| Active | 81 | IEL | VD1_neg | TRG | 3           |
| Active | 81 | IEL | VD1_neg | TRG | 9           |

|        |    |     |         |     |            |
|--------|----|-----|---------|-----|------------|
| Active | 81 | IEL | VD1_neg | TRG | 10         |
| Active | 81 | IEL | VD1_neg | TRG | 9          |
| Active | 81 | IEL | VD1_neg | TRG | 9          |
| Active | 81 | IEL | VD1_neg | TRG | 3          |
| Active | 81 | IEL | VD1_neg | TRG | 8          |
| Active | 81 | IEL | VD1_neg | TRG | 2          |
| Active | 81 | IEL | VD1_neg | TRG | 3          |
| Active | 81 | IEL | VD1_neg | TRG | 2          |
| Active | 81 | IEL | VD1_neg | TRG | 4          |
| Active | 81 | IEL | VD1_neg | TRG | 8          |
| Active | 81 | IEL | VD1_neg | TRG | 3          |
| Active | 81 | IEL | VD1_neg | TRG | 8          |
| Active | 81 | IEL | VD1_neg | TRG | 4          |
| Active | 81 | IEL | VD1_neg | TRG | 3          |
| Active | 81 | IEL | VD1_neg | TRG | 8          |
| Active | 81 | IEL | VD1_neg | TRG | 8          |
| Active | 81 | IEL | VD1_neg | TRG | 2          |
| Active | 81 | IEL | VD1_neg | TRG | 2          |
| Active | 81 | IEL | VD1_neg | TRG | 4          |
| Active | 81 | IEL | VD1_neg | TRG | 8          |
| Active | 81 | IEL | VD1_neg | TRG | 8          |
| Active | 81 | IEL | VD1_neg | TRG | 3          |
| Active | 81 | IEL | VD1_neg | TRG | 4          |
| Active | 81 | IEL | VD1_neg | TRG | 8          |
| Active | 81 | IEL | VD1_neg | TRG | 9          |
| Active | 81 | IEL | VD1_neg | TRG | 3          |
| Active | 22 | IEL | VD1_neg | TRG | 2          |
| Active | 22 | IEL | VD1_neg | TRG | 2          |
| Active | 22 | IEL | VD1_neg | TRG | 5          |
| Active | 22 | IEL | VD1_neg | TRG | 9          |
| Active | 22 | IEL | VD1_neg | TRG | 9          |
| Active | 22 | IEL | VD1_neg | TRG | 8          |
| Active | 22 | IEL | VD1_neg | TRG | 8          |
| Active | 22 | IEL | VD1_neg | TRG | 9          |
| Active | 22 | IEL | VD1_neg | TRG | 2          |
| Active | 22 | IEL | VD1_neg | TRG | 9          |
| Active | 22 | IEL | VD1_neg | TRG | 5          |
| Active | 22 | IEL | VD1_neg | TRG | 5          |
| Active | 22 | IEL | VD1_neg | TRG | 9          |
| Active | 22 | IEL | VD1_neg | TRD | 1          |
| Active | 22 | IEL | VD1_neg | TRD | 3          |
| Active | 22 | IEL | VD1_neg | TRD | 3          |
| Active | 22 | IEL | VD1_neg | TRD | 3          |
| Active | 22 | IEL | VD1_neg | TRD | 3          |
| Active | 22 | IEL | VD1_neg | TRD | 3          |
| Active | 22 | IEL | VD1_neg | TRD | 3          |
| Active | 22 | IEL | VD1_neg | TRD | TRAV29/DV5 |
| Active | 22 | IEL | VD1_neg | TRD | 3          |
| Active | 22 | IEL | VD1_neg | TRD | 3          |
| Active | 22 | IEL | VD1_neg | TRD | 1          |
| Active | 22 | IEL | VD1_neg | TRD | 3          |
| Active | 22 | IEL | VD1_neg | TRD | 2          |
| Active | 22 | IEL | VD1_neg | TRD | TRAV29/DV5 |

CDR3 TRJ  
CATWDRLP 1  
CATWDGLP 1  
CATWDRPP 1  
CATRDRLP 1  
CATWDSGN 2  
CAYIEGDAD 1  
CAYREGEAC 1  
CALWEVRY 1  
CATWDGPN 1  
CALGDAFPL 1  
CALGNPPTL 1  
CALGESTIRC 1  
CALGVPPFRQ 1  
CALGDLPPS 1  
CALGTSIPH 1  
CALGERKLG 1  
CALGDAFPL 1  
CALGDAFPM 1  
CALGDASPL 1  
CALGNPPTP 1  
CALGNRPTL 1  
CALGESTVR 1  
CALGERLFP 1  
CALPGLGGC 1  
CATLTGGPY 1  
CALGEIVPLC 1  
CALGELIHSY 1  
CALGENWRM 1  
CALGESRVL 1  
CALGEFLPV 1  
CALGERGCF 1  
CALPGLGGC 1  
CALGELNPY 1  
CALGERLFP 1  
CALWEVHYY 1  
CATPITGWF 1 P1  
CATWDGYSE 2 P2  
CATWDGYSE 2 P2  
CATWEYRKC 2 P2  
CATWDGPAC 2 P2  
CATWDGPAC 2 P2  
CATWDGSAC 2 P2  
CATWGGPAC 2 P2  
CAAWDSPQE 1  
CAVWDSPQE 1  
CATWDGPHY 1  
CATWDRPSE 1  
CALGDQRVF 1  
CALGEPWAS 1  
CALGDQRVF 1  
CALGEIPYP 1  
CALGDRWGI 1  
CALPRNATL 1  
CALGALPLLI 1  
CALGDIPSQ 1

CALGGLYLY 1  
CDLGELGHF 1  
CALGESRRF 1  
CAFGEIPYP1 1  
CALGEIPYP1 1  
CGWGDRWG 1  
CALREINYYk 2  
CALTPSSGP 2  
CALWEINYYI 1  
CAAWDCFVF P1  
CATWTPYPP 1  
CAPWTPYPP 1  
CATWTPHPP 1  
CATWDGWRI 1  
CATRDGRRH 1  
CATWDGWGI 1  
CATWGGWRI 1  
CALWEVLYK 1  
CALWEGYDY 1  
CATWSYYKK 1  
CATWLGYKK 1  
CATWLSFGY 1  
CATWDGVYY 1  
CALGGQRGI 1  
CALGDPPSY 1  
CALGEGMHV 1  
CALGLGAFLI 1  
CALGDPPSY 1  
CASGGQRGI 1  
CALGEPGRV 1  
CALGGQWLL 1  
CALGDPGLP 1  
CALGDPAFP 1  
CALGDLSPLI 1  
CALGELVPS 1  
CALGVLFVPI 1  
CALGETRFL 1  
CALGEPIFLF 1  
CALGSMGDT 1  
CALGDQRVF 1  
CALGELVRS 1  
CATWDGPNY 2  
CALGELSPP 2  
CALGASYVP 2  
CATWDRHYK 1  
CATRDRHYK 1  
CAAWDLPSF P2  
CAAWDLPSF P2  
CALWEVGY 1  
CASLYYKKLI 1  
CATWEVGYk 1  
CTPWEVGYk 1  
CATWSHYK 1  
CALTENYYKI 2  
CATWPLRG 2  
CATWDNYKK 1



CATWDCRKK 1  
CATWDGPDY 1  
CATGSHYYK 1  
CATWDLRGE P2  
CATWDRRFH P2  
CATWDLAWN 1  
CATRDLAWN 1  
CALGLTPLGI 1  
CALGELPDL 1  
CALGELTIFP 1  
CAFDWPSRV 1  
CALGEPLPTI 1  
CALGEKAFLI 1  
CALGEGISGI 1  
CALGDQLSP 1  
CALGVLGRP 1  
CALGEPYQI 1  
CALGDFLP 1  
CALGGCWR 1  
CALGDPLSIC 1  
CALGTLPVYI 1  
CALGVLGRP 1  
CALGEIFPTY 1  
CALGELTIFP 1  
CAFDWHACV 1  
CALELRGPG 1  
CALELRGPG 1  
CALGEGISDI 1  
CALGEVSDY 1  
CALGDFLRP 1  
CVLGDLFGP 1  
CALGEVYRL 1  
CALGGYPGC 2  
CALGDISGP 2  
CALGERLRG 2  
CALGELGGE 2  
CALGELGGE 2  
CAAWDGPR 1  
CATWDGPRY 1  
CALGDNYKK 1  
CATWDSPLG 1  
CATWDGPVY 1  
CATWDGPYA 1  
CATWDRVDY 1  
CATWLFYK 1  
CATWFFYK 1  
CATWDVERK 1  
CATWDRPAC 1  
CATWDRQPY 1  
CATWDEGY 1  
CATWDRLYY 1  
CATWDGPA 1  
CATWDAHLY 1  
CATWDGPN 1  
CATWDGQG 1  
CATWDGTYY 1

CATWDGPVY 1  
CATWDRHYK 1  
CATWDKNYY 2  
CALRPVQCC 1  
CALWEVLYK 1  
CALWEVRYK 1  
CATWDRTEK 1  
CATWDLHGY 1  
CATWGNEKL 1  
CATWDAKAF 1  
CATWSHYYK 1  
CATWDRRAC 1  
CATWEGYKK 1  
CATWDFGVC 1  
CATWDGLFG 1  
CATWDGLEK 1  
CATWDGLKK 1  
CAAWDYPPE P1  
CATWDMSTC P1  
CATWDDATG P1  
CATWDRPVY P2  
CATWDRPKC P2  
CATWDRISSI P2  
CATWDRPYC P2  
CAVPSATYV 1  
CALWEVNFY 1  
CALWEVLYR 1  
CALWEVRDV 1  
CATWDYYKK 1  
CATWDGTNY 1  
CATWDGLGF 1  
CALGERKSF 1  
CALGETLPS 1  
CALGAPLRR 1  
CALSILVLGE 1  
CALGETFLG 1  
CALGELRPS 1  
CALGVEGLP 1  
CALGETINSY 1  
CALGELLRG 1  
CALGEVPYV 1  
CALGPLSLP 1  
CALGDLPTW 1  
CALGELGGV 1  
CALGEGFQF 1  
CALGEFLDW 1  
CALGFILLGE 1  
CALGHQYFL 1  
CALGPSGGI 1  
CALGAPLGT 1  
CALGEPTVTI 1  
CALGALPFI 1  
CALGEGARL 1  
CALRTRFLLC 1  
CALGEQTTR 1  
CALGEQYPN 1

CALGAPLRR 1  
CALGAPLRR 1  
CALGELIRSY 1  
CALGELPTG 1  
CALGELYRS 1  
CALGEQYTS 1  
CALGEPWAE 1  
CALGEVFP 1  
CALGVLKVR 1  
CALGEIIPKY 1  
CALGEPHFT 1  
CALGEPNIP 1  
CALGELPSH 1  
CALVCPHYM 1  
CALGASSGN 1  
CALGEHVWA 1  
CALGPRVVL 1  
CALGELRGL 1  
CALGERDGV 1  
CALGGYTDK 1  
CALGEGFQF 1  
CALGELRAF 1  
CALGELHWC 1  
CALGYLYSR 1  
CALGVLGTF 1  
CALGDPPPS 1  
CALGVPLGY 1  
CALGGSLPM 1  
CALGVGFHP 1  
CALGEPDTD 1  
CALGERWAT 1  
CALGVPPFL 1  
CALGEHPMC 1  
CALGVLVDT 1  
CALGELTTD 1  
CALGELRPH 1  
CALGELRAL 1  
CALGELYTG 1  
CALGGRSYC 1  
CAVGEPPIF 1  
CALGDLYTL 1  
CALGDPYFL 1  
CALGEHGSV 1  
CARGDLHWC 1  
CALGELVLR 1  
CALLLPTGM 1  
CAAVKKLF 1  
CALWEVRKK 1  
CATWDRPYK 1  
CATWDSYKK 1  
CATWARSDV P2  
CATWDGFDV P2  
CATTDHYKK 1  
CALWEVRYK 1  
CATWDHYKK 1  
CALWEVPEL 1

CALVGRCPN 1  
CALWEVSEL 1  
CALGELEGP 1  
CALGEAGGF 1  
CALGGGWRI 1  
CALGELEGP 1  
CALGELEGS 1  
CALGDPPTG 1  
CALGDPPTG 1  
CALGDPPTG 1  
CATWDGYKk 1  
CAAWDGYKl 1  
CAAWKNYYk 1  
CAAWPFYYY 1  
CALWEGPDY 1  
CALWEAPNI 1  
CATWAVNYK 1  
CATWASSYK 1  
CATWDPFYY 1  
CATWDGPLV 1  
CATWDERHY 1  
CATWDTFHY 1  
CATWDGLYY 1  
CATWDRPGI 1  
CATWDRPRN 1  
CATWHSYWE 1  
CATWDDYKK 1  
CATWGHKKL 1  
CATWDGRNk 1  
CATWDFNYY 2  
CATWDSPNY 2  
CAAWDYGG\ P1  
CAAWELYTT P1  
CALWEVSYT P1  
CATWDIQGW P1  
CATWDNSAT P1  
CATWDRDYS P1  
CATWDRHGE P1  
CATWEWFKII P1  
CATWDLDPT P1  
CATWDRACV P1  
CATWDGSRE P1  
CAAKALEQIL 1  
CAARVGFLl 1  
CALWEVQRE 1  
CALWEVLPG 1  
CALWEPGKk 1  
CATWDNYKK 1  
CATWDGSYY 1  
CATWDGQR\ 1  
CATWDGRHk 1  
CALGELPTS 1  
CALGEFGRT 1  
CALGEAFLLI 1  
CALGWRRPε 1  
CALGGGRGF 1

CALGEGSAF 1  
CALGEPQYS 1  
CALGERPLL 1  
CALGEPFLR 1  
CALGQNRDY 1  
CALGELLLP 1  
CALGRLPNM 1  
CALGARRPS 1  
CALGELPTS 1  
CALGEPQSF 1  
CALGVLSLQ 1  
CALGSASLY 1  
CALGRGVRC 1  
CALGELSGF 1  
CALGKFLRG 1  
CALGGKYWK 1  
CALGGFRTG 1  
CALGERRPT 1  
CALGEQRTF 1  
CALGELSMG 1  
CALGDPLYM 1  
CALGDGGLF 1  
CALGELEYL 1  
CALGAGLPS 1  
CALGEASWC 1  
CALGELSGL 1  
CALGELFRG 1  
CALGDPPVL 1  
CALGARGSC 1  
CALEAAVPY 1  
CALGEPFGT 1  
CALGELWWII 1  
CALGEGFLP 1  
CALAGSYLR 1  
CALGESSYL 1  
CALGDPRAR 1  
CALGVRAVIF 1  
CALGEESLH 1  
CALGETPPR 1  
CALGPRPSP 1  
CALGELASY 1  
CALGLTLRP 1  
CALGEKVFP 1  
CALGETSSR 1  
CALGERGLP 1  
CALGEDGWC 1  
CALGSPRDL 1  
CALLGDPTRI 1  
CATWDGRNY 2  
CALGERRPR 2  
CALGELPGP 2  
CALGELRPS 2  
CALGELSGR 2  
CALGASEFG 2  
CAAWGQYT P1  
CALWEVRKE P1

CATWWTARS P1  
CATWDGHHTP1  
CAAWDFLIYI 1  
CALWWQKLF 1  
CALWEDAGK 1  
CATWDRRGV 1  
CATWDGPKT 1  
CATWDGLGY 1  
CATWDGYYK 1  
CATWDRLYV 1  
CATWDRLNY 1  
CATWDRLKK 1  
CATWDGPHY 1  
CATWDGGSF 1  
CATWAPNYY 2  
CATWNGYYK 2  
CATWDGPPN 2  
CATWLNYYK 2  
CATWDSGKL 1  
CATWDRQG/ 1  
CATWDWGLF 1  
CATWDRPEK 1  
CATWDRRQK 1  
CATWDRQEL 1  
CALWTSLQE P  
CATWDHSQE P  
CATWDRPQE P  
CAAWVHTTG P1  
CAAWDLAIG' P1  
CATWITGWF| P1  
CATWGRVDC P2  
CATWDGRG\$ P2  
CAYRGRDQF 1  
CASIFTGGY/ 1  
CAAWDRGPF 1  
CALWEAPWL 1  
CATWDGPRY 1  
CALTLPTSG| 1  
CATWDGYYK 1  
CALGDLRGG 1  
CALGQGWY\$ 1  
CALGDPLLD 1  
CALGELSSG 1  
CALGELDPT| 1  
CALGDSLPT 1  
CALGEGHWK 1  
CALGELRWC 1  
CALGEPVLN 1  
CALGERLPH 1  
CALGELRVP 1  
CALGELGFL| 1  
CALGEGFLP 1  
CALGELETD| 1  
CALGDPDFE 1  
CALGPRGDF 1  
CALGPRGDF 1

CALGIQWPS 1  
CALGGWNFL 1  
CALGSAQVC 1  
CALLYPSRR 1  
CALGEGNPL 1  
CALGATFFAI 1  
CALGERQYF 1  
CALGEPPLP 1  
CALGATSRP 1  
CALGIFRPSY 1  
CALGKSPLS 1  
CALGEIGNL 1  
CALGGAPLG 1  
CALGEPYWC 1  
CALGDPVLD 1  
CALGGAPLG 1  
CALGLHWGI 1  
CALGEHWFL 1  
CALGGPGVL 1  
CALGETAFLI 1  
CAFGEHWFL 1  
CALGEQVGF 1  
CALGEESL 1  
CALGGAPLG 1  
CALGGAPPC 1  
CATWDRQTY 2  
CACDTVTYRI 2  
CALGEPTAH 2  
CATWDTTGVP 1  
CALWYYYKK 1  
CALRVYYYKK 1  
CACDTSGVF 1  
CALGELTFAI 1  
CALGESLEP 1  
CALGDTFIQC 1  
CALGEPPTS 1  
CALGELPTYI 1  
CALGEPTFAI 1  
CALGDTFIQC 1  
CALGEGLPT 1  
CALGERRCT 1  
CALGELPFR 1  
CALGEPHSS 1  
CALGETYLG 1  
CALGEVGFS 1  
CALGESFPF 1  
CALGELHPR 1  
CALGELDLG 1  
CALEEPHSS 1  
CALWEDYYK 2  
CALWEVLIN 2  
CATWNYYYK 1  
CATWDGPG 1  
CALWEAHLN 1  
CALWETRGY 1  
CALWEVLLG 1

CALWERTYY 1  
CALWERRGY 1  
CALWEPPYY 1  
CALCETRGY 1  
CATWGRNYK 1  
CACDELGD 1  
CALGELRGT 1  
CALGEYHHW 1  
CALGEYSGY 1  
CALGYLGPN 1  
CALGERSFP 1  
CALGERSSD 1  
CALGELVRM 1  
CALGEILIGG 1  
CALGELDPLI 1  
CALGELRGP 1  
CALGDPSTP 1  
CALGEWTRK 1  
CALGELAVT 1  
CALGVRGLG 1  
CALGGLSSH 1  
CALGERLLY 1  
CALGELVRM 1  
CALGEYHHW 1  
CALGDHQFP 1  
CALGEHLLIF 1  
CALAGGTYT 1  
CALGGLTFLI 1  
CALGELSLLC 1  
CALGERSSF 1  
CALGECETS 1  
CALGEDVPT 1  
CALGSLHLG 1  
CALGERLKA 1  
CALGERPAG 1  
CALVLLSDV 1  
CALVGVGAY 1  
CALGECPPG 1  
CALGEFSRP 1  
CALGEGLRK 1  
CALGELYRG 1  
CALGELDAP 1  
CALGDQYTD 1  
CALGELVVIF 1  
CALGELRPS 1  
CALGDRHYR 1  
CALGELAFLI 1  
CALGEDSWC 1  
CALGELLPS 1  
CALGETPPF 1  
CALGGPSTF 1  
CALGELFRG 1  
CALGQSTYY 1  
CALRELLRA 1  
CALGELLRA 1  
CALGERRGC 1



CALGVFIPG\ 1  
CALWEVLNY 2  
CALWDANYY 2  
CATWDNGYk 2  
CATWDGQG` 2  
CATWATNYY 2  
CALWEVRWf 1  
CATWDRNYK 1  
CATWDGPHk 1  
CATWDGYYk 1  
CATWDGYKk 1  
CATWDRRG P2  
CATWELLGG P2  
CATWDSRGE 1  
CATWDLGDK 1  
CATWDGPYY 1  
CATEHNYKK 1  
CATWDGPPs 1  
CATWDGIYYl 1  
CATWDGGGI 2  
CATWNYYK 2  
CATWDGLCS P2  
CATWEWDWl P2  
CALGEPLLS: 1  
CALGELPPY 1  
CALGELIGWl 1  
CALGEFVPLl 1  
CALGGPLLS 1  
CALGEPLFS: 1  
CALGELTGW 1  
CALGELPTTl 1  
CALGERGHL 1  
CALGEFRELl 1  
CALGERGHL 1  
CALGYKGVf 1  
CALGAPWGs 1  
CATWDRLRA 1  
CATWDRQRf 1  
CALWPSSFR P1  
CALWPSGFF P1  
CATWDGLGE 1  
CATWDGFGE 1  
CAPWEGLGE 1  
CATWDGVSN 2  
CATWDGVSN 2  
CATWDGGS\ 2  
CATWDRAWl P1  
CATWDIKAT( P1  
CAAWDCNYk 1  
CALWEAGKk 1  
CALWEVGKk 1  
CALREAGKK 1  
CATWINYYl 1  
CATWDGRG\ 1  
CATWDFYYK 1  
CATWEEGYk 1

CATWDSLNY 2  
CATWDGRAL 2  
CATWDGLSN 2  
CATWDGRYK 1  
CATWDGRTP1  
CATWDRDTG P1  
CATWDRQGI 1  
CAFMSSSLH 1  
CATWDGPKE 1  
CALGGGIPL 1  
CALGEISYS 1  
CALGELLGG 1  
CALGDLYFPI 1  
CALRGAGLV 1  
CALGRILYTE 1  
CALGELSPL 1  
CALGEYVGY 1  
CALVRCLDW 1  
CALGELDPG 1  
CALGDLRGV 1  
CALLTPREK 1  
CALGLTFPTI 1  
CALGEPISP 1  
CALGEPGPL 1  
CALGELFLV 1  
CALGGVARF 1  
CALGDFPKL 1  
CALGEQWG 1  
CALGEFFPI 1  
CALGFPSGL 1  
CALVGGIPR 1  
CALGEPYGV 1  
CALGERFPT 1  
CALGDRTTV 1  
CALGESSWC 1  
CALGDLLLVI 1  
CALGELRVL 1  
CALGELAWC 1  
CALGETLGD 1  
CALGDLRGD 1  
CALGDIPPR 1  
CALGELAPT 1  
CALGERMSE 1  
CALGEGNKL 1  
CALGARYGE 1  
CALGVLP SY 1  
CALGFLLGDI 1  
CALGELRGE 1  
CALGELVVL 1  
CAIGVLPSSL 1  
CALGDRLLH 1  
CALGVLP SY 1  
CAIGVLPSSF 1  
CALGVLLSF 1  
CALGVLP SY 1  
CAIGFLAGDF 1

CATWDSPNY 2  
CATWDNPNY 2  
CALGERRPR 2  
CALSPGSAF 2  
CALGSWPLV 2  
CAFYLDTRQI 3  
CALGENPMV 3  
CATLDSPNY 1  
CATWETTGM P1  
CATWWSRGE P2  
CATRVSRGD P2  
CATWDGGEI 1  
CATWGTKKK 1  
CATWDGPFH 1  
CATWDGKKK 1  
CALGEQRVF 1  
CALGEPFL 1  
CALGELPNS 1  
CALGEIVNP 1  
CALGEVRGL 1  
CALGELDWA 1  
CALGVQRVF 1  
CATWDGTLY 1  
CATWDGFYY 1  
CALWEFNQM 2  
CATWEGSDV P2  
CALWAAGYY 1  
CALWEDDYY 1  
CATWSPYY 1  
CATWDYYKK 1  
CATWDGPV 1  
CALGERWLS 1  
CALGEHTLH 1  
CALGEGRVF 1  
CALGELSHN 1  
CALGGEIFG 1  
CALGPRLRL 1  
CALGGSYHF 1  
CALGELWAT 1  
CALGERYWC 1  
CALGERIRP 1  
CALGEGLLE 1  
CALGESGVV 1  
CALGERKGE 1  
CALGEPGTP 1  
CALGELRGL 1  
CALGERWFS 1  
CALGGEIFG 1  
CALGEHTLY 1  
CALGESGVV 1  
CALGELAYA 1  
CALGELRSG 1  
CALGVPLLY 1  
CALGELSYD 1  
CALGERVVL 1  
CALGECSSM 1

CALGERDLP 1  
CALGPPKAD 1  
CALGERRGT 1  
CAFGGGGP1 1  
CALGELSYD 1  
CALGEYFWC 1  
CALGECSSM 1  
CALGELRSG 1  
CALGEWGS( 1  
CATWDSSPN 2  
CAAWDYHKK 1  
CATWDGDYY 1  
CALWEVNTT P1  
CATWDEVTT P1  
CATWDEATT P1  
CALWAYYKK 1  
CATWDPPRY 1  
CATWDGPRF 2  
CATWDRPGM 1  
CATQTYKK 1  
CALWEVFLV P  
CALWEVFLV P  
CAAWDYGA1 P1  
CATWERYTT P1  
CALWEFTNY 1  
CATWDRPGY 1  
CATWRYKK 1  
CALGEESSG 1  
CALGELFPK 1  
CALGEQRPF 1  
CALGELNPT: 1  
CALGEPWFC 1  
CALGEEPSC 1  
CTLGEESSG 1  
CALGEPLPTI 1  
CALGEAGGF 1  
CALGPPSPG 1  
CALGEERSG 1  
CALGGRRGC 1  
CALGESSPS 1  
CALGPWEG 1  
CALGDLPRG 1  
CALGEERG 1  
CATWDGFAN 2  
CATWERSNY 2  
CATWDPPHY 1  
CATWITYYY 1  
CALWEVLLG P  
CALWEVLLG P  
CAAWDLGTC P1  
CALWEKDYY 1  
CALWECRY 1  
CALWEARRC 1  
CALWEVLYY 1  
CATWDSGYY 1  
CATWDGVTE 1

CATWDEFLF\ 1  
CATWDGTNY 2  
CALWGRTGV P1  
CALWELLGV P1  
CALWELIGW P1  
CATWEIGDG P1  
CATWDRPTT P1  
CATWDGRDA P1  
CATWDEGG\ P1  
CATWDEGG\ P1  
CATWDPSSC P2  
CATWDVAWI P2  
CATWDAQSC P2  
CATWDGRG\ P2  
CATWDGPG\ P2  
CALWDYMSY 1  
CALWEAPLD 1  
CATWDRLYP 1  
CATWGRLYY 1  
CATWGRLYY 1  
CATWGRLYY 1  
CATWDRPPC 1  
CALGELVRG 1  
CALGEQASV 1  
CALGDLAPIC 1  
CALGELKAG 1  
CALGEPERG 1  
CALGGPLRY 1  
CALGRGPRV 1  
CALGEGSRT 1  
CALGLRIPFF 1  
CALGELPPY 1  
CALGERNRF 1  
CALGARFFH' 1  
CALGEP SFR 1  
CALGELKGS 1  
CALGGPLSY 1  
CALGEEVFP 1  
CALGELRGR 1  
CALGEQVSC 1  
CALGEVERG 1  
CAPGERGR\ 1  
CALGEFRR\ 1  
CALGPSFLV\ 1  
CALGELPLP' 1  
CALGTPSPC 1  
CALGAVMGA 1  
CALGDGTSY 1  
CALGELTTW 1  
CALGETTPE\ 1  
CALGERVLG 1  
CALGEPLPS 1  
CALGVNPLP 1  
CALGEPPQT 1  
CALGEAPYV 1  
CALGELETG 1

CALGEPRIA1 1  
CALGEMAYC 1  
CALGALLPF\ 1  
CALGAFPTH\ 1  
CALGESRLN 1  
CALGEPSTF 1  
CALGERRWT 1  
CALGEPNGC 1  
CALGAASLP 1  
CALGGPPSF 1  
CALGEVLTG 1  
CALGNIRPFT 1  
CALGGIFLP\ 1  
CALGELFGG 1  
CSAGEGPYC 1  
CALGGPLPK 1  
CALGEPCLL\ 1  
CALGELGPP 1  
CALGFTFQTI 1  
CALGERTEA 1  
CALGELPGIL 1  
CALGELRLG 1  
CALGPLRTG 1  
CALGEPPPV 1  
CALGGTPDV\ 1  
CALGAPFGS 1  
CALGAPFLI 1  
CALGPKVRD 1  
CALGELGGE 1  
CALGTARGT 1  
CALGEPLDC 1  
CAANSFLW\ 2  
CATWDRKYY 2  
CATWENYYK 2  
CALGELPIP\ 2  
CALGERSYP 2  
CAAWDYKKL 1  
CALWEVYYK 1  
CALWEGKG\ 1  
CAAWWHKKL 1  
CATWDEYKK 1  
CALWERYG\ 2  
CALWESGWI P1  
CATWDGRTT P1  
CATWDTTG P1  
CATWDGPRF P1  
CATWDGTGV P1  
CATWDRPVC P2  
CALSGALGD 1  
CAVSGAVGE 1  
CALSGAGGE 1  
CALSGTLGD 1  
CALSGALGD 1  
CATWEGDY\ 1  
CAPWTSPP\ 1  
CACGLPRRG 1

CATWDGFYY 1  
CALGDAPVL 1  
CALGDPHWC 1  
CALGEPPLR 1  
CALGEPQI 1  
CALGKFLSY 1  
CALGERHIS 1  
CALGELYFR 1  
CALGELIPSY 1  
CALGERTFS 1  
CALGEAPFT 1  
CALGEEVFG 1  
CALGGILRW 1  
CALGNLPY 1  
CALGVPPGF 1  
CALGELFFL 1  
CALWKFLSY 1  
CALGERKSR 1  
CALGDRLYF 1  
CALGETPFL 1  
CALGERNLP 1  
CALGELGLK 1  
CALGELVEL 1  
CALGEPSLP 1  
CALGERSYS 1  
CALGTRLPR 1  
CAFGERSYS 1  
CALGDPPFV 1  
CALGEMQLS 1  
CALGEPLPS 1  
CALGELTPS 1  
CALGELVKG 1  
CALGEPLER 1  
CALGELPVL 1  
CALGLLPTL 1  
CALGEKEGY 1  
CALGDLPTL 1  
CALGEIFPT 1  
CALGEEVFG 1  
CALGERPY 1  
CALGELSYK 1  
CALGEVPD 1  
CALGIFGHW 1  
CALGEPFFF 1  
CALGEHTLL 1  
CALGAYNPL 1  
CALGNPVLG 1  
CALGEPFLR 1  
CALGELILRI 1  
CALSFVDTDI 1  
CALARDDKL 1  
CALGELTFS 1  
CALGDYTGT 1  
CALGELRKT 1  
CALGELHPG 1  
CALWEVAM 2

CALWEVHYY 2  
CALGERVSL 2  
CALWEVDYK 1  
CALREVDYK 1  
CATWDSLK 1  
CALWEVHEL P1  
CALREVHEL P1  
CATWDAPEF P2  
CAAWDWYGI 1  
CALWEVDYK 1  
CALWEFPFY 1  
CALWEVRNY 1  
CALWEVRKY 1  
CALSTYYKKI 1  
CALWNYKK 1  
CATWYYKK 1  
CATWDRPGY 1  
CATWDGGGI 1  
CATWDRPGY 1  
CATWDRGYY 1  
CATWDGERY 1  
CATWDNPYY 1  
CATWDRRY 1  
CATWDRPFY 1  
CATWDGPKA 1  
CATWDGRVV 1  
CATWDGLYY 1  
CATSDGPTA 1  
CATWDGYYK 1  
CALWEVRAS 2  
CATWDISNY 2  
CATWDRPGY 2  
CATWDTPRF 2  
CATWDGPNY 2  
CALWEVCYK 1  
CATWDRPEK 1  
CATWDRKKL 1  
CATWDRQLE 1  
CALWEVCGEP  
CATWEAGGI P  
CALWEGPLV P1  
CATWEALTG P1  
CATWDSRTG P1  
CACPSDWIK P2  
CALWETLGS P2  
CALWFWIK P2  
CATWEYSSC P2  
CATWAYSSC P2  
CATWDIPDP P2  
CAPPGGGLY 1  
CAFISPNGY 1  
CALGVPSKA 1  
CALGGRSFP 1  
CALGERFPS 1  
CALGEERRA 1  
CALGERPSV 1



CALGAAFPT 1  
CALGDDPLP 1  
CALGAHSAL 1  
CALGDHRSR 1  
CALGELRGR 1  
CALGERKPY 1  
CALGELTPT` 1  
CALVLSRYQ 1  
CALGEGWGI 1  
CALGDPPFS 1  
CALGYTPFV' 1  
CALGDPSFS 1  
CALGPPKPR 1  
CALGEIYDA( 1  
CALGELPSP 1  
CALGDSTYM 1  
CALGELGPY 1  
CALGELVMV 1  
CALGLRRW 1  
CALGAGEDT 1  
CALGPPGDL 2  
CAAPHFY 1  
CALWEVPSF 1  
CALWEVRY 1  
CALWEPGFK 1  
CALWEGEFF 1  
CALWEVPMF 1  
CATWEEWD\ 1  
CATWEVDYK 1  
CATWDTYYK 1  
CATWDGPVV 1  
CATSPSDRE 1  
CAAWNYYKk 2  
CAAWDCIKK| 2  
CALWEVQAL 2  
CALWEASV\ 2  
CATWDGPSL 2  
CALWEVQVF 1  
CALWEVRRK 1  
CATWDSRKK 1  
CATWGNKKL 1  
CATWEQKKL 1  
CATWDRPFG 1  
CALWEVQEL P  
CALWEVLLIL P  
CALWEVSEL P  
CATWDRNTT P1  
CALWGDWIK P2  
CATWIDLGG: P2  
CATWDLTSS P2  
CALGESTAF| 1  
CALGERLWF 1  
CALGEELGR 1  
CALGERPPP 1  
CALGDGYIP, 1  
CALGELSGP 1

CALGELGDW 1  
CALGERCWF 1  
CALGEWTAF 1  
CALQVLPTR 1  
CALGGRRFR 1  
CALGKTHYG 1  
CALGSSFLR 1  
CALGEIGSFL 1  
CALGECWGI 1  
CALGELPPW 1  
CALWEARGC 2  
CALWEARTG 2  
CALWEARDC 1  
CATWDYYKK 1  
CATWRIGYK 1  
CATWDGGE 1  
CATWDGGY 1  
CAAWALYYK 1  
CALWEVVDY 1  
CALWEEPYY 1  
CATWGGYK 1  
CACDRVLGE 1  
CALGDGRAY 1  
CALGETSWA 1  
CALGEISFTC 1  
CALGESWNL 1  
CALGELHWC 1  
CALGELSPL 1  
CALGELRVF 1  
CALGEYEFL 1  
CALGALVWA 1  
CALGELYPS 1  
CALGHSLLG 1  
CALGDAWGI 1  
CALGEPVLR 1  
CALGDFLPQ 1  
CALGDFLPH 1  
CALGDFLPH 1  
CALGEVQGC 1  
CALGGTAAG 1  
CALGELSLH 1  
CALGAATGD 1  
CALGLRLGD 1  
CALGGTAAG 1  
CALGERNLR 2  
CALWEVHKK 1  
CATWDSGGI 1  
CAWDRPKYY 1  
CAAWDSGGI 1  
CATWDPYYK 1  
CATWDRRGV 1  
CATWDRPEK 1  
CATWDRPAA 1  
CATWDRPCY 1  
CATWRPEK 1  
CATWWHYKK 1

CATWHYKK 1  
CALWEAFNY 2  
CATWDRPCV 2  
CALWEVLYK 1  
CATWELHKK 1  
CATWDRLCR P2  
CATWDRPCF P2  
CATWDGPYS P2  
CALWEVHEK 1  
CAFRRVFNLI 1  
CATWDPYYK 1  
CALGELSLD 1  
CALGEGATL 1  
CALGEREPK 1  
CALGGPPSY 1  
CALGESYFL 1  
CALGEAVSR 1  
CALGELRLW 1  
CALGELPVM 1  
CALGEPKIL 1  
CALGEGGW 1  
CALGELQRV 1  
CALGDCGLL 1  
CALGELFQM 1  
CALGKAFLK 1  
CALGSNFPW 1  
CALGPPERE 1  
CALGELAYL 1  
CALGEPLTP 1  
CALGEVNGF 1  
CALGEPKIL 1  
CALGELSLG 1  
CALGELNGP 1  
CALGERYIKL 1  
CALGDLAAS 1  
CALGELHHP 1  
CALGELHHP 1  
CALGEPPSF 1  
CALGESFLP 1  
CALGVTLPV 1  
CALGTASFP 1  
CALGALTTS 1  
CALGDPFPT 1  
CALGELPPG 1  
CALGVPSFK 1  
CALLTGGYIC 1  
CALGGTVPY 1  
CALGETSRT 1  
CALGEHPSR 1  
CALGELQPR 1  
CALGAFTTS 1  
CALGALTTS 1  
CALGALTTS 1  
CALGVGLPA 1  
CALGELRPIL 1  
CALGAPHSE 1

CALGGFPAT 1  
CALGELLGA 1  
CALGDPFPT 1  
CALGDRFRG 1  
CALGERMAS 1  
CATWDPKLN 2  
CATWDGHGI 2  
CALGESDSY 2  
CALGGGLPT 2  
CALGEFSSD 2  
CALGEFSSD 2  
CATWDGPYK 1  
CATWEERKK 1  
CATWDGGEI 1  
CATWDRQGF 1  
CATWDRPNY 1  
CATWDGRGF 1  
CATWDRRGF 1  
CATWDGRYY 1  
CATWPTHYK 1  
CATWYYYKK 1  
CATWDRPYY 1  
CATWDRRGK 1  
CATWDGRYY 1  
CATWDRIGHI 2  
CATWATNDY 2  
CATWDRSPK 1  
CATWDGYKK 1  
CATWDGYYY 1  
CATWDAHKK 1  
CATWDIGTT(P1  
CATWAGWFF(P1  
CALGDPQSA 1  
CALGEPHPS 1  
CALGSRLNP 1  
CALGELPSQ 1  
CALGVPPFQ 1  
CALGDPQSA 1  
CARGDRQSI 1  
CAPGLPLDK 1  
CALGELFLP 2  
CALWEVRPN 2  
CALFFPVTN 2  
CALWEARPN 2  
CALFEVVPN 2  
CALLEAVPN 2  
CALLEAVTN 2  
CALLEVGN 2  
CALWEALPN 2  
CALWEVLPN 2  
CATWEGRQI 2  
CALWEPGEK 1  
CATWDRGDV(P2  
CALWEVLGS 1  
CAWWEVVG 1  
CALWEETLV 1

CALWEVPPY 1  
CATWDLSGY 1  
CAAWDLSGY 1  
CATWDSGYC 1  
CATWDVGY 1  
CATWDRRRT 1  
CATWGRLYY 1  
CAFSLPQRT 1  
CALGEVSPR 1  
CALGGPSYF 1  
CALGPLPTL 1  
CALGELHPG 1  
CALGELLPR 1  
CALGEPSPV 1  
CALGELQFS 1  
CALGDSKLN 1  
CALGGRPGF 1  
CALGELFPG 1  
CALGELLRS 1  
CALGDSRLA 1  
CALGKGMTF 1  
CALGEMSYA 1  
CALGEPRAF 1  
CALGELLPLI 1  
CALPAGGRL 1  
CALGERHLR 1  
CALGVLPTW 1  
CALGASAES 1  
CALGAWEES 1  
CALGEHNWC 1  
CALGEPKVP 1  
CALGARDPG 1  
CAGADLLPG 1  
CALGEPSPV 1  
CALGGRVMC 1  
CALGVVGRG 1  
CALGLPFPHI 1  
CALGEPFFR 1  
CALGELGGC 1  
CALGPRIFLH 1  
CALGELDLF 1  
CALGELFSYI 1  
CALGELRPF 1  
CALGAKGGT 1  
CALGEPGILV 1  
CALGELGGC 1  
CALGELGGC 1  
CALGELTTL 1  
CALGPRIFLH 1  
CALGPSPLL 1  
CALGGSLPP 1  
CALGERFTG 1  
CALGEFSLP 1  
CALGEFSLP 1  
CALGELYGC 1  
CALGELAQY 1

CALGEPFFR 1  
CGLGEPLIR 1  
CALGELDLF 1  
CGVGGHLHG 1  
CALGEVRGV 1  
CASGELDRV 1  
CALGKWGGI 1  
CALGERLGR 1  
CALWLHSN 2  
CALGARPPR 2  
CALWEVAKL 1  
CATWDRNKK 1  
CATWDLPPK 1  
CATWATTRD 2  
CATWDGTTG P1  
CALWEGTLL 1  
CALWEVLPF 1  
CVVKGKLF 1  
CATWDGSTF 1  
CATWGWQI 1  
CATWGWQI 1  
CATWDGPLM 1  
CAAWDLTTG P1  
CAAWDFHM P1  
CALWEVERT P1  
CATWDGLYA P1  
CATWDTTGV P1  
CATWDPTGV P1  
CATWDRDSE P2  
CALGAAVFG 1  
CALGETRFLI 1  
CALGELGVV 1  
CALGELGITF 1  
CALGELTYW 1  
CALGELGAT 1  
CAFGERLFP 1  
CALGELPLI 1  
CALGELSST 1  
CALGEISSYF 1  
CALGELGCT 1  
CALGELPIAL 1  
CALGELRPH 1  
CALGAWAPL 2  
CALGEPGNN 1  
CALGERGGI 1  
CALGPRKTLI 1  
CACDTLGCW 2  
CACDSYWGF 1  
CALGERRWC 1  
CALGAAVFG 1  
CALGAAVFG 1  
CALGERLGT 1  
CALGELTGG 1  
CALGGFPAY 1  
CALGELGVL 1  
CALWEFYK 1

CATWDRLGV P1  
CATWDGPNY 2  
CATWDGPFA 1  
CATWDTPKE P  
CATWDGPLA P1  
CAAWDSPIY 1  
CATWDRRNY 1  
CALWEMNYY 1  
CALWGSGEI 1  
CALWEPVPL 1  
CATWESEEL P  
CALWEPVYI 1  
CATWDGYTT P1  
CATWDGPQF 1  
CALWEGPNY 2  
CALWEVQNY 1  
CAAWENTTG P1  
CATWDGPYY 1  
CATWDGLRE 1  
CATWGNYYK 2  
CATWGYLNK 1  
CAAWDLYKK 2  
CATWDGRW 1  
CALWVPVPL 1  
CALGERVSA 1  
CALGDTFRL 1  
CAFWGSYT 1  
CALGELRGC 1  
CALGDPPMS 1  
CALSFLPWG 1  
CALGELAWL 1  
CALGERKPIF 1  
CALGEAGYV 1  
CALGEFMGV 1  
CAFLPPLGV 1  
CALGESGPS 1  
CALGEASLFI 1  
CALGEKPKR 1  
CALGDTFRL 1  
CALGELPWC 1  
CALGELWLL 1  
CALGELIPLL 1  
CATWDRYYK 1  
CATWDKRG 1  
CAADPWDYK 1  
CATWEGAYK 1  
CALWEVQG 2  
CATWDRRYK 1  
CATWDRRAF 2  
CATWDGTIT 1  
CATWDGRQE 1  
CATWDRLNY 1  
CATWDGLNK 1  
CATWTYYKK 2  
CATWDRVSF 1  
CATWDGLGY 1

CATWDGLYY 1  
CATWDGRYK 1  
CATWDRHYK 1  
CATWNRYYY 1  
CATWERGYK 1  
CATWDRELF 1  
CALWEVRYK 1  
CATWDGLHY 1  
CATWDGDTM 1  
CALWEVLFR 2  
CATWDRRAI 2  
CATWDPYYK 1  
CATWDGLRS 1  
CATWDIPNY 2  
CATWDRPDY 1  
CALGDSFPL 1  
CALGEIPRG 1  
CALGERVPF 1  
CALGDPSYF 2  
CALGELFIIF 1  
CALGELGLT 1  
CALGEFIDW 1  
CALGEK GAL 1  
CALGDHFLH 1  
CALGELALP 1  
CALGEVWVL 2  
CALGDPFLP 1  
CALGEILQS 1  
CALGEPYFL 1  
CALGEPTPP 1  
CLLGDHVLG 1  
CAYSHALRV 1  
CAYSHALRV 1  
CAYRTL YSG 1  
CAAPEPSQII 1  
CAASARYLP 1  
CAASARGYA 1  
CAAIYPPIWC 1  
CAASASGGI 1  
CAARASPWC 1  
CAASVPPVL 1  
CAASGLSHV 1  
CAASKDYWC 1  
CAVGFLWGT 1  
CARVLESGG 1  
CAFTDWGIRI 1  
CASSLSSLF 1  
CAFSALETE 1  
CASPLWDWC 1  
CAFLKENWG 4  
CAFPRSDSY 1  
CAFSLLSRG 1  
CALTASSYR 1  
CAFSDFLLC 1  
CASAPRTLL 1  
CASPSTWGM 1



CARVLESGG 1  
CARVVESSG 1  
CAFKRLGDP 1  
CAIYSYSSG 1  
CALSPFPKV 1  
CALIALGDTY 1  
CAFFKENRG 4  
CAFLKENRG 4  
CASSYANWC 1  
CAFRTGLGM 1  
CASASHFTDI 1  
CAFSPQRGL 1  
CAFPPSPLY 1  
CAFVPFDKLI 1  
CAFSPANWI 1  
CAFIPATWKL 2  
CASKGLSPY 1  
CAFVLLGVA 1  
CASRRVSSG 1  
CAFTRPSYDI 1  
CASALPTAD 1  
CAFLQAFLV 1  
CASTSPPSA 1  
CALNSICPLL 1  
CAFSLHYW 1  
CAFSTHWG 1  
CALNYWGIR 1  
CAFKVTWGII 1  
CALFFSRRT 1  
CAFSKEWGY 1  
CASRGGYG 1  
CAFRGWGS 1  
CAFNDWGIK 1  
CAFRCYHTDI 1  
CACDPTPRG 1  
CACDTGGYF 1  
CACDTGGSF 1  
CACDTGGIR 1  
CACDTGRYV 1  
CACDPPHYV 1  
CACDTGWGF 3  
CACDRRGYF 1  
CACDYGSG 1  
CACARYWGF 1  
CATWARHYK 1  
CALWEVGFY 1  
CATWGEAK 1  
CATWDGVNY 2  
CALWEALPN 2  
CALWEVSYN 2  
CATWDRHGE P2  
CALWGVGFY 1  
CATWDRPSE P2  
CATWDGPNY 2  
CATWDGVYY 1  
CATWDGPDY 1

CATWDGRG\ 1  
CATWAYKKL 1  
CAAWDLVVV 2  
CATWDGPIH\ P1  
CATWDGGS\ 2  
CATWDRQGF 2  
CATWDRRIG\ 1  
CATWDRGG\ 1  
CATWDTPGE 1  
CATWKTNY 2  
CATWDGYDY 2  
CATWDRRSY 1  
CATWSTGWF P1  
CATWDGLEF P1  
CATWDPRRC 1  
CATWDPNKK 1  
CATWDRYKK 1  
CATWDRYNK 1  
CATWDRTKK 1  
CATWDMKKL 1  
CALGPAPLA 3  
CALGGKLN\ 3  
CALGELDLG 3  
CALGEPYPC 3  
CALGELIPLL 4  
CALGELSPN 4  
CALGELPSY 3  
CALGEYIPL\ 3  
CALGELLGG 4  
CAGGESRSV 3  
CATWDGPLY P2  
CALWEVQGF 1  
CATWDGYY\ 1  
CALWTIGYKI 2  
CATWDRPGF 1  
CALWGYYK\ 1  
CALWEVHKF 2  
CATWDGLNY 2  
CALWGYVR\ 1  
CATWAGE\ 1  
CATWDITRG\ 1  
CATWDGTLP 1  
CATWDRPNS P2  
CATWDGKR\ 2  
CALREVQGF 1  
CASWEEQGI 1  
CATWDRTDY 1  
CATWDRSGE 1  
CAAWDGPLY P2  
CAAMQGS\ P2  
CALWETKGY 2  
CATWEGSY\ 1  
CATWDGPN\ 1  
CATWDGRDY 1  
CATWASTPE 1  
CAAWDGYY\ 1

CATWDGNAK 1  
CATWSYYKK 1  
CATWDRRGK 1  
CATWDSPKK 1  
CATWDGRGF 1  
CATWDSKKL 1  
CALWEVGF 1  
CAYRSANRC 1  
CACDTRSDN 1  
CAARSPPL 1  
CAFQVLLWV 1  
CGLTRLGPP 1  
CASRLGMVF 1  
CALGELAPA 3  
CALGERSEG 1  
CAFMLLRGV 1  
CAYRSARGF 3  
CAFNPIWGIF 1  
CACDTKGVA 1  
CAFRPMYWC 1  
CAFTLSDHG 1  
CAYRSWWG 1  
CAFLGDRGT 1  
CALAPWEIT 1  
CAFGYTDKL 1  
CALRGTDKL 1  
CAMREYPSS 1  
CAYRGPTNL 1  
CAFRGFLLPI 1  
CAFRTLPLY 1  
CAFTHPCVL 1  
CAFSPSHNM 1  
CACDTHSRM 1  
CAFRGGAVL 1  
CALGRAQGC 1  
CAFAYGSS 1  
CAFAYGSY 1  
CAFNPIWGIF 1  
CAFNPMWGI 1  
CAASAFFRA 1  
CALGELTGR 1  
CAFRGWGIM 1  
CAYGFPTGG 1  
CAASAHGEF 1  
CACAPLYWC 1  
CASPTESGG 1  
CAFQFPTVL 1  
CACDTKLWG 1  
CALRGLGDC 1  
CAYRRVGAN 1  
CACDTGYGE 1  
CAFTVWDPD 1  
CAATCTGRK 1  
CASGYTDKL 1  
CATWDRLHY 1  
CALGWGYKI 1

CAAWGTFAF 1  
CALWEVQAN P2  
CALWEVRTR 1  
CATWDRPYY 1  
CATWDGYYK 1  
CATWEGGLS P2  
CATWDRPCE P2  
CATWDGRYY 1  
CATWGGRD\ P2  
CATWDLDYY 1  
CATWDYFYK 1  
CATWDFSHS P2  
CATWDHHTT P1  
CATWDGKNY 2  
CATWDPLTG P1  
CATWEIGSD' P2  
CATWDCCGV P1  
CATWDVWY\ 1  
CATWDGPLY 1  
CATWERSDV P2  
CATWHTTGV P1  
CATWDYFYK 1  
CATWDGTYK 1  
CATWEIYYKI 2  
CALWEVYYK 1  
CATWDLYKK 1  
CATWRRWFk P1  
CATWKNKKL 1  
CATWDTNNY 2  
CALWEPQG\ 1  
CALWEVLQII 2  
CATWDRNYY 2  
CATWDHKEN 2  
CALWEVLQII 2  
CATWDGPPN 1  
CALWELQGY 1  
CATRDTNNY' 2  
CATWDTSNY 2  
CALWEVIKKI 1  
CALGECHKG 3  
CAFTSGVHS 2  
CAFRMPTRD 1  
CAFRLPRYW 1  
CAFRGGWW 1  
CAFDTEVAG 1  
CAASVDGLV 1  
CALGTLGSM 1  
CAFTYAEKG 1  
CALGEPLRY 2  
CAFLQPTRLI 1  
CACDTGMPF 1  
CAASARTFG 1
