# Supplementary material
Source: PubMed Central journal article supplement (PMC6667191)
Supplement: NIHMS1030275-supplement-Table_S5.pdf [file NIHMS1030275-supplement-Table_S5.pdf]

| Level tested | Tissue | Group   | Feature Tested | Active vs. Control | GFD vs. Control |
|--------------|--------|---------|----------------|--------------------|-----------------|
| Group        | IEL    |         | TRGV10         | 0.6586             | 0.895           |
| Group        | IEL    |         | TRGV9          | 0.2366             | 0.0878          |
| Group        | IEL    |         | TRGV8          | 0.6206             | 0.6388          |
| Group        | IEL    |         | TRGV5          | 0.1861             | 0.3732          |
| Group        | IEL    |         | TRGV4          | <b>3.33E-07</b>    | <b>1.98E-13</b> |
| Group        | IEL    |         | TRGV3          | <b>0.0163</b>      | 0.0258          |
| Group        | IEL    |         | TRGV2          | 0.2381             | 0.2028          |
| Individual   | IEL    |         | TRGV10         | 0.8562             | 0.4251          |
| Individual   | IEL    |         | TRGV9          | 0.7448             | 0.1894          |
| Individual   | IEL    |         | TRGV8          | 0.7598             | 0.8909          |
| Individual   | IEL    |         | TRGV5          | 0.4378             | 0.8303          |
| Individual   | IEL    |         | TRGV4          | <b>0.0001</b>      | <b>2.67E-06</b> |
| Individual   | IEL    |         | TRGV3          | <b>0.0227</b>      | 0.1024          |
| Individual   | IEL    |         | TRGV2          | 0.5222             | 0.4769          |
| Group        | PBL    |         | TRGV10         | 0.1647             | 0.966           |
| Group        | PBL    |         | TRGV9          | 0.5127             | 0.5824          |
| Group        | PBL    |         | TRGV8          | 0.0478             | 0.8136          |
| Group        | PBL    |         | TRGV5          | 0.7639             | 0.5881          |
| Group        | PBL    |         | TRGV4          | 0.7376             | 0.4946          |
| Group        | PBL    |         | TRGV3          | 0.5254             | 0.5691          |
| Group        | PBL    |         | TRGV2          | <b>0.0441</b>      | 0.8633          |
| Individual   | PBL    |         | TRGV10         | 0.0869             | 0.9769          |
| Individual   | PBL    |         | TRGV9          | 0.3522             | 0.5815          |
| Individual   | PBL    |         | TRGV8          | 0.0773             | 0.974           |
| Individual   | PBL    |         | TRGV5          | 0.8372             | 0.4867          |
| Individual   | PBL    |         | TRGV4          | 0.3124             | 0.3929          |
| Individual   | PBL    |         | TRGV3          | 0.147              | 0.1513          |
| Individual   | PBL    |         | TRGV2          | <b>0.0023</b>      | 0.4572          |
| Group        |        | Control | TRGV10         |                    |                 |
| Group        |        | Control | TRGV9          |                    |                 |
| Group        |        | Control | TRGV8          |                    |                 |
| Group        |        | Control | TRGV5          |                    |                 |
| Group        |        | Control | TRGV4          |                    |                 |
| Group        |        | Control | TRGV3          |                    |                 |
| Group        |        | Control | TRGV2          |                    |                 |
| Individual   |        | Control | TRGV10         |                    |                 |
| Individual   |        | Control | TRGV9          |                    |                 |
| Individual   |        | Control | TRGV8          |                    |                 |
| Individual   |        | Control | TRGV5          |                    |                 |
| Individual   |        | Control | TRGV4          |                    |                 |

|            |  |         |        |  |  |
|------------|--|---------|--------|--|--|
| Individual |  | Control | TRGV3  |  |  |
| Individual |  | Control | TRGV2  |  |  |
| Group      |  | Active  | TRGV10 |  |  |
| Group      |  | Active  | TRGV9  |  |  |
| Group      |  | Active  | TRGV8  |  |  |
| Group      |  | Active  | TRGV5  |  |  |
| Group      |  | Active  | TRGV4  |  |  |
| Group      |  | Active  | TRGV3  |  |  |
| Group      |  | Active  | TRGV2  |  |  |
| Individual |  | Active  | TRGV10 |  |  |
| Individual |  | Active  | TRGV9  |  |  |
| Individual |  | Active  | TRGV8  |  |  |
| Individual |  | Active  | TRGV5  |  |  |
| Individual |  | Active  | TRGV4  |  |  |
| Individual |  | Active  | TRGV3  |  |  |
| Individual |  | Active  | TRGV2  |  |  |
| Group      |  | GFD     | TRGV10 |  |  |
| Group      |  | GFD     | TRGV9  |  |  |
| Group      |  | GFD     | TRGV8  |  |  |
| Group      |  | GFD     | TRGV5  |  |  |
| Group      |  | GFD     | TRGV4  |  |  |
| Group      |  | GFD     | TRGV3  |  |  |
| Group      |  | GFD     | TRGV2  |  |  |
| Individual |  | GFD     | TRGV10 |  |  |
| Individual |  | GFD     | TRGV9  |  |  |
| Individual |  | GFD     | TRGV8  |  |  |
| Individual |  | GFD     | TRGV5  |  |  |
| Individual |  | GFD     | TRGV4  |  |  |
| Individual |  | GFD     | TRGV3  |  |  |
| Individual |  | GFD     | TRGV2  |  |  |

| Active vs. GFD | IEL vs. PBL     |
|----------------|-----------------|
| 0.8408         |                 |
| 6.37E-05       |                 |
| 0.9991         |                 |
| 0.7844         |                 |
| 0.0025         |                 |
| 0.6894         |                 |
| 0.9911         |                 |
| 0.5324         |                 |
| 0.1051         |                 |
| 0.6659         |                 |
| 0.3374         |                 |
| 0.2217         |                 |
| 0.548          |                 |
| 0.9264         |                 |
| 0.2523         |                 |
| 0.1425         |                 |
| 0.239          |                 |
| 0.3314         |                 |
| 0.8983         |                 |
| 0.9962         |                 |
| 0.2618         |                 |
| 0.1177         |                 |
| 0.1591         |                 |
| 0.0974         |                 |
| 0.3712         |                 |
| 0.9619         |                 |
| 0.8559         |                 |
| 0.0402         |                 |
|                | 0.7526          |
|                | 0.0295          |
|                | 0.0089          |
|                | 0.2271          |
|                | <b>2.00E-09</b> |
|                | <b>0.0285</b>   |
|                | 0.9034          |
|                | 0.7983          |
|                | 0.0792          |
|                | 0.1212          |
|                | 0.5045          |
|                | <b>1.58E-05</b> |

|  |               |
|--|---------------|
|  | <b>0.0226</b> |
|  | 0.5418        |
|  | 0.109         |
|  | <b>0.0065</b> |
|  | 0.5003        |
|  | 0.8383        |
|  | 0.1878        |
|  | 0.0107        |
|  | 0.2949        |
|  | 0.0613        |
|  | <b>0.0282</b> |
|  | 0.7801        |
|  | 0.9327        |
|  | 0.9035        |
|  | 0.1424        |
|  | 0.4762        |
|  | 0.731         |
|  | 0.1818        |
|  | 0.1859        |
|  | 0.2991        |
|  | 0.0662        |
|  | 0.0713        |
|  | 0.3078        |
|  | 0.7054        |
|  | 0.3995        |
|  | 0.0711        |
|  | 0.9984        |
|  | 0.2085        |
|  | 0.1378        |
|  | 0.4699        |

| Level tested | Tissue | Group   | Feature tested | Active vs. Control | GFD vs. Control |
|--------------|--------|---------|----------------|--------------------|-----------------|
| Group        | IEL    |         | TRJ1           | 0.9306             | 0.9978          |
| Group        | IEL    |         | TRJP1          | 0.3945             | 0.0791          |
| Group        | IEL    |         | TRJP2          | 0.8508             | 0.9705          |
| Group        | IEL    |         | TRJ2           | 0.2984             | 0.721           |
| Group        | IEL    |         | TRJP           | 0.9382             | 0.9756          |
| Individual   | IEL    |         | TRJ1           | 0.8324             | 0.5546          |
| Individual   | IEL    |         | TRJP1          | 0.1894             | 0.1416          |
| Individual   | IEL    |         | TRJP2          | 0.9603             | 0.8388          |
| Individual   | IEL    |         | TRJ2           | 0.3565             | 0.8795          |
| Individual   | IEL    |         | TRJP           | 0.3688             | 0.3776          |
| Group        | PBL    |         | TRJ1           | 0.0933             | 0.6495          |
| Group        | PBL    |         | TRJP1          | 0.763              | 0.4682          |
| Group        | PBL    |         | TRJP2          | 0.5907             | 0.719           |
| Group        | PBL    |         | TRJ2           | 0.1366             | 0.9915          |
| Group        | PBL    |         | TRJP           | 0.6304             | 0.7898          |
| Individual   | PBL    |         | TRJ1           | 0.0711             | 0.4854          |
| Individual   | PBL    |         | TRJP1          | 0.4882             | 0.3514          |
| Individual   | PBL    |         | TRJP2          | 0.444              | 0.7084          |
| Individual   | PBL    |         | TRJ2           | 0.0439             | 0.9693          |
| Individual   | PBL    |         | TRJP           | 0.985              | 0.9735          |
| Group        | IEL    | Control | TRJ1           |                    |                 |
| Group        | IEL    | Control | TRJP1          |                    |                 |
| Group        | IEL    | Control | TRJP2          |                    |                 |
| Group        | IEL    | Control | TRJ2           |                    |                 |
| Group        | IEL    | Control | TRJP           |                    |                 |
| Individual   | IEL    | Control | TRJ1           |                    |                 |
| Individual   | IEL    | Control | TRJP1          |                    |                 |
| Individual   | IEL    | Control | TRJP2          |                    |                 |
| Individual   | IEL    | Control | TRJ2           |                    |                 |
| Individual   | IEL    | Control | TRJP           |                    |                 |
| Group        | IEL    | Active  | TRJ1           |                    |                 |
| Group        | IEL    | Active  | TRJP1          |                    |                 |
| Group        | IEL    | Active  | TRJP2          |                    |                 |
| Group        | IEL    | Active  | TRJ2           |                    |                 |
| Group        | IEL    | Active  | TRJP           |                    |                 |
| Individual   | IEL    | Active  | TRJ1           |                    |                 |
| Individual   | IEL    | Active  | TRJP1          |                    |                 |
| Individual   | IEL    | Active  | TRJP2          |                    |                 |
| Individual   | IEL    | Active  | TRJ2           |                    |                 |
| Individual   | IEL    | Active  | TRJP           |                    |                 |

|            |     |     |       |  |  |
|------------|-----|-----|-------|--|--|
| Group      | IEL | GFD | TRJ1  |  |  |
| Group      | IEL | GFD | TRJP1 |  |  |
| Group      | IEL | GFD | TRJP2 |  |  |
| Group      | IEL | GFD | TRJ2  |  |  |
| Group      | IEL | GFD | TRJP  |  |  |
| Individual | IEL | GFD | TRJ1  |  |  |
| Individual | IEL | GFD | TRJP1 |  |  |
| Individual | IEL | GFD | TRJP2 |  |  |
| Individual | IEL | GFD | TRJ2  |  |  |
| Individual | IEL | GFD | TRJP  |  |  |

| Active vs. GFD | IEL vs. PBL |
|----------------|-------------|
| 0.9319         |             |
| 0.5751         |             |
| 0.9294         |             |
| 0.0284         |             |
| 0.7924         |             |
| 0.6988         |             |
| 0.8319         |             |
| 0.8015         |             |
| 0.2968         |             |
| 0.9866         |             |
| 0.6174         |             |
| 0.8241         |             |
| 0.3321         |             |
| 0.2397         |             |
| 0.9782         |             |
| 0.3491         |             |
| 0.736          |             |
| 0.287          |             |
| 0.0696         |             |
| 0.9864         |             |
|                | 0.1677      |
|                | 0.5185      |
|                | 0.3267      |
|                | 0.5131      |
|                | 0.9289      |
|                | 0.0295      |
|                | 0.8857      |
|                | 0.4541      |
|                | 0.6069      |
|                | 0.6033      |
|                | 0.6166      |
|                | 0.806       |
|                | 0.593       |
|                | 0.8532      |
|                | 0.4262      |
|                | 0.696       |
|                | 0.6068      |
|                | 0.9481      |
|                | 0.9872      |
|                | 0.6448      |

|  |        |
|--|--------|
|  | 0.7052 |
|  | 0.8447 |
|  | 0.8447 |
|  | 0.8639 |
|  | 0.3991 |
|  | 0.9049 |
|  | 0.8017 |
|  | 0.3294 |
|  | 0.8732 |
|  | 0.7284 |



| Level Tested | Tissue | Amino Acid | Active vs. Control | GFD vs. Control | Active vs. GFD |
|--------------|--------|------------|--------------------|-----------------|----------------|
| Group        | IEL    | A          | 0.3177             | 0.3834          | 0.9905         |
| Group        | IEL    | R          | 0.6925             | 0.9355          | 0.4243         |
| Group        | IEL    | N          | 0.0365             | 0.2052          | 0.6386         |
| Group        | IEL    | D          | <b>0.0015</b>      | 0.085           | 0.2872         |
| Group        | IEL    | C          | 0.9967             | 0.7203          | 0.7402         |
| Group        | IEL    | Q          | 0.2356             | 0.7822          | 0.5409         |
| Group        | IEL    | E          | 0.3595             | 0.9264          | 0.1559         |
| Group        | IEL    | G          | 0.2735             | 0.7071          | 0.7028         |
| Group        | IEL    | H          | 0.4007             | 0.8226          | 0.7389         |
| Group        | IEL    | I          | 0.9184             | 0.4469          | 0.6531         |
| Group        | IEL    | L          | 0.5511             | 0.4632          | 0.9867         |
| Group        | IEL    | K          | 0.5682             | 0.3231          | 0.8834         |
| Group        | IEL    | M          | 0.74               | 0.7575          | 0.9995         |
| Group        | IEL    | F          | 0.9759             | 0.9573          | 0.9967         |
| Group        | IEL    | P          | 0.9367             | 0.9438          | 0.7529         |
| Group        | IEL    | S          | 0.9998             | 0.8886          | 0.8614         |
| Group        | IEL    | T          | 0.1634             | 0.4437          | 0.7906         |
| Group        | IEL    | W          | 0.9063             | 0.4003          | 0.6166         |
| Group        | IEL    | Y          | <b>0.0139</b>      | <b>0.0133</b>   | 0.9997         |
| Group        | IEL    | V          | 0.9082             | 0.9241          | 0.6686         |
| Individual   | IEL    | A          | 0.0932             | 0.1027          | 0.9945         |
| Individual   | IEL    | R          | 0.0158             | 0.6375          | 0.0603         |
| Individual   | IEL    | N          | 0.0818             | 0.186           | 0.7108         |
| Individual   | IEL    | D          | <b>0.0015</b>      | 0.0925          | 0.1553         |
| Individual   | IEL    | C          | 0.5381             | 0.2901          | 0.1018         |
| Individual   | IEL    | Q          | 0.0662             | 0.5103          | 0.2583         |
| Individual   | IEL    | E          | 0.5062             | 0.7009          | 0.3048         |
| Individual   | IEL    | G          | 0.9475             | 0.5067          | 0.5482         |
| Individual   | IEL    | H          | 0.9377             | 0.829           | 0.8884         |
| Individual   | IEL    | I          | 0.4324             | 0.7931          | 0.3082         |
| Individual   | IEL    | L          | 0.7453             | 0.7233          | 0.5047         |
| Individual   | IEL    | K          | 0.8695             | 0.723           | 0.6082         |
| Individual   | IEL    | M          | 0.9352             | 0.999           | 0.9384         |
| Individual   | IEL    | F          | 0.188              | 0.7888          | 0.3138         |
| Individual   | IEL    | P          | 0.9074             | 0.669           | 0.5895         |
| Individual   | IEL    | S          | 0.6494             | 0.6733          | 0.3897         |
| Individual   | IEL    | T          | 0.3728             | 0.8506          | 0.5006         |
| Individual   | IEL    | W          | 0.2338             | 0.3849          | 0.7764         |
| Individual   | IEL    | Y          | <b>0.0001</b>      | <b>0.0003</b>   | 0.9331         |
| Individual   | IEL    | V          | 0.5665             | 0.5631          | 0.98           |
| Group        | PBL    | A          | 0.9995             | 0.3726          | 0.4243         |
| Group        | PBL    | R          | 0.9895             | 0.9989          | 0.9966         |
| Group        | PBL    | N          | 0.3177             | 0.212           | 0.9146         |

|            |     |   |        |        |               |
|------------|-----|---|--------|--------|---------------|
| Group      | PBL | D | 0.7552 | 0.9188 | 0.5814        |
| Group      | PBL | C | 0.2183 | 0.1079 | 0.6574        |
| Group      | PBL | Q | 0.8226 | 0.9335 | 0.6756        |
| Group      | PBL | E | 0.9713 | 0.7195 | 0.6182        |
| Group      | PBL | G | 0.5122 | 0.1045 | <b>0.0303</b> |
| Group      | PBL | H | 0.462  | 0.9597 | 0.7245        |
| Group      | PBL | I | 0.082  | 0.8581 | 0.3641        |
| Group      | PBL | L | 0.3154 | 0.9431 | 0.5959        |
| Group      | PBL | K | 0.6587 | 0.2943 | 0.7911        |
| Group      | PBL | M | 0.4192 | 0.7229 | 0.2065        |
| Group      | PBL | F | 0.9348 | 0.2551 | 0.4566        |
| Group      | PBL | P | 0.3296 | 0.763  | 0.1358        |
| Group      | PBL | S | 0.4341 | 0.6876 | 0.1517        |
| Group      | PBL | T | 0.434  | 0.2607 | <b>0.029</b>  |
| Group      | PBL | W | 0.6076 | 0.9933 | 0.7516        |
| Group      | PBL | Y | 0.9709 | 0.1748 | 0.1376        |
| Group      | PBL | V | 0.7315 | 0.3547 | 0.1258        |
| Individual | PBL | A | 0.3827 | 0.0818 | 0.314         |
| Individual | PBL | R | 0.8973 | 0.5984 | 0.6716        |
| Individual | PBL | N | 0.1048 | 0.0942 | 0.7808        |
| Individual | PBL | D | 0.1369 | 0.5739 | 0.4364        |
| Individual | PBL | C | 0.4368 | 0.1346 | 0.3911        |
| Individual | PBL | Q | 0.8832 | 0.4715 | 0.5437        |
| Individual | PBL | E | 0.7272 | 0.4057 | 0.246         |
| Individual | PBL | G | 0.183  | 0.0324 | <b>0.0012</b> |
| Individual | PBL | H | 0.4375 | 0.563  | 0.9086        |
| Individual | PBL | I | 0.0674 | 0.7625 | 0.0522        |
| Individual | PBL | L | 0.6285 | 0.9956 | 0.6559        |
| Individual | PBL | K | 0.5018 | 0.2559 | 0.5796        |
| Individual | PBL | M | 0.2397 | 0.505  | 0.0874        |
| Individual | PBL | F | 0.8937 | 0.7749 | 0.6777        |
| Individual | PBL | P | 0.1103 | 0.3921 | 0.0205        |
| Individual | PBL | S | 0.102  | 0.7261 | 0.0653        |
| Individual | PBL | T | 0.5466 | 0.1458 | <b>0.0425</b> |
| Individual | PBL | W | 0.623  | 0.185  | 0.074         |
| Individual | PBL | Y | 0.4271 | 0.3274 | 0.7737        |
| Individual | PBL | V | 0.7418 | 0.3591 | 0.2175        |

| Level tested | Tissue | Feature Tested           | Active vs. Control | GFD vs. Control |
|--------------|--------|--------------------------|--------------------|-----------------|
| Group        | IEL    | TRDD2 - PSY              | 0.5464             | 0.0586          |
| Group        | IEL    | TRDD2 - FL               | <b>0.0344</b>      | 0.1455          |
| Group        | IEL    | TRDD2 - LP               | 0.9508             | 0.9861          |
| Group        | IEL    | TRDD3 - TGGY             | 0.5543             | 0.9495          |
| Group        | IEL    | TRDD3 - WGI              | 0.9992             | 0.0517          |
| Group        | IEL    | TRDD3 - LGDT             | 0.0044             | 0.1215          |
| Group        | IEL    | TRDD2/TRDD3 combinations | 0.0866             | 0.0454          |
| Group        | IEL    | No TRDD usage            | <b>0.0493</b>      | <b>6.84E-06</b> |
| Individual   | IEL    | TRDD2 - PSY              | 0.3223             | 0.0855          |
| Individual   | IEL    | TRDD2 - FL               | <b>0.0232</b>      | 0.2631          |
| Individual   | IEL    | TRDD2 - LP               | 0.9727             | 0.7238          |
| Individual   | IEL    | TRDD3 - TGGY             | 0.8039             | 0.9785          |
| Individual   | IEL    | TRDD3 - WGI              | 0.8816             | 0.1075          |
| Individual   | IEL    | TRDD3 - LGDT             | 0.0563             | 0.3906          |
| Individual   | IEL    | TRDD2/TRDD3 combinations | 0.1029             | 0.0783          |
| Individual   | IEL    | No TRDD usage            | <b>0.0235</b>      | <b>0.0001</b>   |
| Group        | PBL    | TRDD2 - PSY              | 0.9708             | 0.9805          |
| Group        | PBL    | TRDD2 - FL               | 0.2708             | 0.6906          |
| Group        | PBL    | TRDD2 - LP               | 0.9303             | 0.6916          |
| Group        | PBL    | TRDD3 - TGGY             | 0.5265             | 0.0394          |
| Group        | PBL    | TRDD3 - WGI              | 0.5054             | 0.8997          |
| Group        | PBL    | TRDD3 - LGDT             | 0.9643             | 0.9409          |
| Group        | PBL    | TRDD2/TRDD3 combinations | 0.1133             | 0.166           |
| Group        | PBL    | No TRDD usage            | 0.9607             | 0.3625          |
| Individual   | PBL    | TRDD2 - PSY              | 0.3803             | 0.976           |
| Individual   | PBL    | TRDD2 - FL               | 0.1012             | 0.4448          |
| Individual   | PBL    | TRDD2 - LP               | 0.5653             | 0.4596          |
| Individual   | PBL    | TRDD3 - TGGY             | 0.8203             | 0.3082          |
| Individual   | PBL    | TRDD3 - WGI              | 0.7029             | 0.1147          |
| Individual   | PBL    | TRDD3 - LGDT             | 0.7338             | 0.4407          |
| Individual   | PBL    | TRDD2/TRDD3 combinations | 0.0043             | 0.1087          |
| Individual   | PBL    | No TRDD usage            | 0.3553             | 0.2193          |

| <b>Active vs. GFD</b> |
|-----------------------|
|-----------------------|

|       |
|-------|
| 0.261 |
|-------|

|        |
|--------|
| 0.6414 |
|--------|

|        |
|--------|
| 0.8743 |
|--------|

|        |
|--------|
| 0.7169 |
|--------|

|        |
|--------|
| 0.0282 |
|--------|

|        |
|--------|
| 0.3275 |
|--------|

|        |
|--------|
| 0.9391 |
|--------|

|        |
|--------|
| 0.0207 |
|--------|

|        |
|--------|
| 0.4398 |
|--------|

|        |
|--------|
| 0.2689 |
|--------|

|        |
|--------|
| 0.6993 |
|--------|

|        |
|--------|
| 0.7898 |
|--------|

|        |
|--------|
| 0.1422 |
|--------|

|        |
|--------|
| 0.3174 |
|--------|

|       |
|-------|
| 0.856 |
|-------|

|       |
|-------|
| 0.057 |
|-------|

|        |
|--------|
| 0.9997 |
|--------|

|        |
|--------|
| 0.8196 |
|--------|

|        |
|--------|
| 0.8914 |
|--------|

|        |
|--------|
| 0.0043 |
|--------|

|        |
|--------|
| 0.3616 |
|--------|

|        |
|--------|
| 0.8521 |
|--------|

|       |
|-------|
| 0.996 |
|-------|

|        |
|--------|
| 0.5292 |
|--------|

|        |
|--------|
| 0.4462 |
|--------|

|       |
|-------|
| 0.469 |
|-------|

|        |
|--------|
| 0.8156 |
|--------|

|        |
|--------|
| 0.3999 |
|--------|

|        |
|--------|
| 0.0525 |
|--------|

|        |
|--------|
| 0.6296 |
|--------|

|        |
|--------|
| 0.3011 |
|--------|

|        |
|--------|
| 0.6653 |
|--------|

| Level Tested | Tissue | Amino Acid | Active vs. Control | GFD vs. Control | Active vs. GFD |
|--------------|--------|------------|--------------------|-----------------|----------------|
| Group        | IEL    | A          | 0.9994             | 0.9533          | 0.9198         |
| Group        | IEL    | R          | 0.4453             | 0.9635          | 0.499          |
| Group        | IEL    | N          | 0.9571             | 0.9913          | 0.9811         |
| Group        | IEL    | D          | 0.9843             | 0.9999          | 0.9742         |
| Group        | IEL    | C          | 0.6864             | 0.9085          | 0.3375         |
| Group        | IEL    | Q          | 0.6956             | 0.908           | 0.8668         |
| Group        | IEL    | E          | 0.2079             | 0.8927          | 0.3175         |
| Group        | IEL    | G          | 0.847              | 0.4753          | 0.7468         |
| Group        | IEL    | H          | <b>0.0079</b>      | 0.5555          | <b>0.0035</b>  |
| Group        | IEL    | I          | 0.4335             | 0.9973          | 0.2938         |
| Group        | IEL    | L          | 0.699              | 0.8923          | 0.2856         |
| Group        | IEL    | K          | 0.8812             | 0.7538          | 0.9591         |
| Group        | IEL    | M          | 0.5219             | 0.7947          | 0.7114         |
| Group        | IEL    | F          | 0.6826             | 0.8597          | 0.9295         |
| Group        | IEL    | P          | <b>0.041</b>       | <b>0.0017</b>   | 0.3246         |
| Group        | IEL    | S          | 0.9732             | 0.8454          | 0.9199         |
| Group        | IEL    | T          | 0.9067             | 0.5725          | 0.7375         |
| Group        | IEL    | W          | 0.9688             | 0.545           | 0.5599         |
| Group        | IEL    | Y          | 0.2132             | 0.4285          | 0.805          |
| Group        | IEL    | V          | 0.9894             | 0.8628          | 0.8886         |
| Individual   | IEL    | A          | 0.985              | 0.8555          | 0.9629         |
| Individual   | IEL    | R          | 0.9715             | 0.7933          | 0.5802         |
| Individual   | IEL    | N          | 0.2683             | 0.3112          | 0.9743         |
| Individual   | IEL    | D          | 0.7852             | 0.4174          | 0.4079         |
| Individual   | IEL    | C          | 0.2224             | 0.2046          | 0.8401         |
| Individual   | IEL    | Q          | 0.6946             | 0.6814          | 0.981          |
| Individual   | IEL    | E          | 0.0106             | 0.459           | 0.049          |
| Individual   | IEL    | G          | 0.6683             | 0.712           | 0.4673         |
| Individual   | IEL    | H          | <b>0.0103</b>      | 0.7789          | <b>0.0103</b>  |
| Individual   | IEL    | I          | 0.052              | 0.86            | 0.1305         |
| Individual   | IEL    | L          | 0.6415             | 0.6361          | 0.2565         |
| Individual   | IEL    | K          | 0.3023             | 0.4028          | 0.9079         |
| Individual   | IEL    | M          | 0.9335             | 0.4262          | 0.5453         |
| Individual   | IEL    | F          | 0.1314             | 0.1238          | 0.9326         |
| Individual   | IEL    | P          | <b>0.0476</b>      | <b>0.0139</b>   | 0.6589         |
| Individual   | IEL    | S          | 0.6496             | 0.2954          | 0.4594         |
| Individual   | IEL    | T          | 0.7227             | 0.565           | 0.8432         |
| Individual   | IEL    | W          | 0.8419             | 0.8461          | 0.6463         |
| Individual   | IEL    | Y          | 0.5383             | 0.5807          | 0.8745         |
| Individual   | IEL    | V          | 0.2531             | 0.6799          | 0.159          |

|            |     |   |        |        |        |
|------------|-----|---|--------|--------|--------|
| Group      | PBL | A | 0.9578 | 0.4342 | 0.3378 |
| Group      | PBL | R | 0.8759 | 0.8081 | 0.5736 |
| Group      | PBL | N | 0.9338 | 0.5301 | 0.7144 |
| Group      | PBL | D | 0.8029 | 0.7131 | 0.9761 |
| Group      | PBL | C | 0.9692 | 0.995  | 0.9933 |
| Group      | PBL | Q | 0.7728 | 0.7195 | 0.4372 |
| Group      | PBL | E | 0.9508 | 0.242  | 0.4097 |
| Group      | PBL | G | 0.5779 | 0.5607 | 0.1593 |
| Group      | PBL | H | 0.2966 | 0.3401 | 0.9992 |
| Group      | PBL | I | 0.7829 | 0.6145 | 0.9443 |
| Group      | PBL | L | 0.9999 | 0.4719 | 0.4977 |
| Group      | PBL | K | 0.5571 | 0.9119 | 0.4019 |
| Group      | PBL | M | 0.8476 | 0.8552 | 0.6246 |
| Group      | PBL | F | 0.9966 | 0.5893 | 0.5686 |
| Group      | PBL | P | 0.705  | 0.542  | 0.2247 |
| Group      | PBL | S | 0.5588 | 0.9715 | 0.7938 |
| Group      | PBL | T | 0.7266 | 0.9406 | 0.5882 |
| Group      | PBL | W | 0.2823 | 0.3834 | 0.9971 |
| Group      | PBL | Y | 0.9823 | 0.9407 | 0.9851 |
| Group      | PBL | V | 0.9577 | 0.8144 | 0.6883 |
| Individual | PBL | A | 0.909  | 0.3924 | 0.3251 |
| Individual | PBL | R | 0.8041 | 0.7429 | 0.575  |
| Individual | PBL | N | 0.9587 | 0.4226 | 0.4379 |
| Individual | PBL | D | 0.6591 | 0.3818 | 0.6191 |
| Individual | PBL | C | 0.5325 | 0.7098 | 0.8517 |
| Individual | PBL | Q | 0.7369 | 0.5894 | 0.3944 |
| Individual | PBL | E | 0.986  | 0.3223 | 0.3007 |
| Individual | PBL | G | 0.4912 | 0.2075 | 0.0554 |
| Individual | PBL | H | 0.0381 | 0.1031 | 0.8062 |
| Individual | PBL | I | 0.6128 | 0.4903 | 0.8053 |
| Individual | PBL | L | 0.9603 | 0.5877 | 0.6086 |
| Individual | PBL | K | 0.592  | 0.3497 | 0.1458 |
| Individual | PBL | M | 0.7644 | 0.306  | 0.436  |
| Individual | PBL | F | 0.7965 | 0.593  | 0.4369 |
| Individual | PBL | P | 0.7344 | 0.3311 | 0.1949 |
| Individual | PBL | S | 0.705  | 0.4522 | 0.269  |
| Individual | PBL | T | 0.7365 | 0.523  | 0.3342 |
| Individual | PBL | W | 0.1548 | 0.469  | 0.5736 |
| Individual | PBL | Y | 0.7474 | 0.3907 | 0.5563 |
| Individual | PBL | V | 0.9522 | 0.7103 | 0.6624 |
